# Supplementary material for: Mechanistic insights into super-enhancer-related genes as prognostic signatures in colon cancer
Source: publisher site journal article supplement (doi:10.18632/aging.205906), 2024-06-07
Supplement: Supplementary file [file aging-v16i11-205906-supplementary-material-SD3.pdf]

## SUPPLEMENTARY TABLE

Supplementary Table 2. Genes with  $P < 0.01$  in the univariate analysis.

|          | <i>p</i> -value | HR          |
|----------|-----------------|-------------|
| S100A11  | 0.004343611     | 1.487508743 |
| BTBD19   | 0.00089113      | 1.45870721  |
| LZTS2    | 0.000522237     | 1.807077409 |
| ACSL5    | 0.001001566     | 0.743193629 |
| ITGB1    | 0.001205038     | 1.437819296 |
| PPFIBP2  | 3.84E-06        | 0.56669651  |
| FUT4     | 0.001908012     | 0.792675032 |
| RASA3    | 0.000239138     | 1.953158299 |
| HNF1B    | 0.002213428     | 0.633892564 |
| PRR15L   | 1.30E-05        | 0.728492767 |
| SLC25A10 | 0.008165605     | 0.696385056 |
| GATA6    | 0.001019726     | 0.693431733 |
| JUNB     | 0.006129202     | 1.423368894 |
| RHPN2    | 8.95E-05        | 0.6398474   |
| CEBPA    | 0.000233095     | 0.728040599 |
| CYP2S1   | 0.006454524     | 0.809237313 |
| ETFB     | 0.004902666     | 0.728385606 |
| ZNF552   | 0.003001983     | 0.624446982 |
| SPATA2   | 0.001066697     | 0.674213999 |
| ETS2     | 0.005831722     | 0.783848938 |
| PSMG1    | 0.009291438     | 0.79613124  |
| SPRY4    | 0.007014512     | 1.475598899 |
| ABLIM3   | 0.005552087     | 1.37781399  |
| REPIN1   | 0.002972757     | 0.674837116 |
| PRR15    | 0.001433493     | 0.789788149 |
| SYBU     | 0.001660871     | 0.782693099 |
| PLEC     | 0.00371291      | 1.522814194 |
| ADORA2B  | 0.006341077     | 0.81708598  |
| GJC1     | 0.006357807     | 1.726527912 |
| NXN      | 0.009991729     | 1.193947245 |
| GADD45B  | 0.000771276     | 1.344235954 |
| WWTR1    | 0.004248447     | 1.349251887 |
| DCBLD2   | 7.00E-07        | 1.614855247 |
| ANGPT2   | 0.001023235     | 1.311722989 |
