# Supplementary material for: Mechanistic insights into super-enhancer-related genes as prognostic signatures in colon cancer
Source: Aging (Albany NY). 2024 Jun 7;16(11):9918–32. doi: 10.18632/aging.205906 (PMC11210223; doi:10.18632/aging.205906)
Supplement: Supplementary Table 1 [file aging-16-205906-s002.xlsx]

## Sheet: HCT116
Supplementary Table 1. The list of the SERGs from the SEdb for CC HCT116 and HT29 cell lines.
cell line	sample_ID	SE ID	chr	start	end	closest gene
HCT116	SE_01_0034	SE_01_003400172	chr1	149838065	149846395	HIST2H2AA4
	SE_01_0034	SE_01_003400144	chr1	149847685	149855752	HIST2H2BC
	SE_01_0034	SE_01_003400329	chr1	149884188	149889429	HIST2H2BE
	SE_01_0034	SE_01_003400238	chr1	153564317	153573699	S100A2
	SE_01_0034	SE_01_003400293	chr1	154969847	154977122	SHC1
	SE_01_0034	SE_01_003400276	chr1	154998856	155026801	ZBTB7B
	SE_01_0034	SE_01_003400239	chr1	155127482	155137774	SLC50A1
	SE_01_0034	SE_01_003400055	chr1	156096045	156131120	LMNA
	SE_01_0034	SE_01_003400211	chr1	156744727	156753291	HDGF
	SE_01_0034	SE_01_003400272	chr1	15832548	15851181	SPEN
	SE_01_0034	SE_01_003400056	chr1	16138584	16189566	EPHA2
	SE_01_0034	SE_01_003400060	chr1	172869827	172935858	TNFSF18
	SE_01_0034	SE_01_003400274	chr1	202005426	202064964	ELF3
	SE_01_0034	SE_01_003400116	chr1	223699415	223739071	CAPN2
	SE_01_0034	SE_01_003400264	chr1	23553759	23562971	ID3
	SE_01_0034	SE_01_003400305	chr1	244832544	244843182	FAM36A
	SE_01_0034	SE_01_003400334	chr1	26691603	26706697	ARID1A
	SE_01_0034	SE_01_003400199	chr1	26848012	26873035	SFN
	SE_01_0034	SE_01_003400166	chr1	26989565	27013910	TRNP1
	SE_01_0034	SE_01_003400159	chr1	27525323	27570053	AHDC1
	SE_01_0034	SE_01_003400080	chr1	28499586	28538866	RCC1
	SE_01_0034	SE_01_003400214	chr1	32757452	32774049	KIAA1522
	SE_01_0034	SE_01_003400339	chr1	36372916	36402837	STK40
	SE_01_0034	SE_01_003400294	chr1	42922846	42968261	FLJ32224
	SE_01_0034	SE_01_003400169	chr1	43347914	43374942	CDC20
	SE_01_0034	SE_01_003400351	chr1	44706971	44743505	KIF2C
	SE_01_0034	SE_01_003400017	chr1	66256005	66360553	PDE4B
	SE_01_0034	SE_01_003400311	chr1	68376027	68395215	RPE65
	SE_01_0034	SE_01_003400009	chr1	8004052	8138949	ERRFI1
	SE_01_0034	SE_01_003400079	chr1	8153668	8213243	SLC45A1
	SE_01_0034	SE_01_003400088	chr1	84141170	84179124	PRKACB
	SE_01_0034	SE_01_003400275	chr1	8871046	8904421	ENO1
	SE_01_0034	SE_01_003400223	chr1	93679705	93706902	BCAR3
	SE_01_0034	SE_01_003400021	chr1	94196195	94330902	ARHGAP29
	SE_01_0034	SE_01_003400138	chr10	100362230	100375677	NCRNA00263
	SE_01_0034	SE_01_003400091	chr10	104108813	104128116	C10orf78
	SE_01_0034	SE_01_003400158	chr10	110395252	110417737	DUSP5
	SE_01_0034	SE_01_003400362	chr10	110495613	110536703	DUSP5
	SE_01_0034	SE_01_003400043	chr10	112359825	112406095	ACSL5
	SE_01_0034	SE_01_003400007	chr10	112471288	112565498	VTI1A
	SE_01_0034	SE_01_003400196	chr10	112948471	112966068	TCF7L2
	SE_01_0034	SE_01_003400281	chr10	113067557	113094581	TCF7L2
	SE_01_0034	SE_01_003400146	chr10	11870650	11902239	C10orf47
	SE_01_0034	SE_01_003400302	chr10	22815413	22826768	PIP4K2A
	SE_01_0034	SE_01_003400085	chr10	28077078	28140461	ARMC4
	SE_01_0034	SE_01_003400318	chr10	3089659	3096790	PFKP
	SE_01_0034	SE_01_003400130	chr10	31912001	31948161	ARHGAP12
	SE_01_0034	SE_01_003400212	chr10	43394861	43421616	HNRNPF
	SE_01_0034	SE_01_003400243	chr10	4660381	4705390	LOC100216001
	SE_01_0034	SE_01_003400176	chr10	52312555	52321352	DKK1
	SE_01_0034	SE_01_003400295	chr10	70557904	70581023	PRF1
	SE_01_0034	SE_01_003400348	chr10	72290764	72333591	DDIT4
	SE_01_0034	SE_01_003400193	chr10	73883378	73911225	PLAU
	SE_01_0034	SE_01_003400242	chr10	80195499	80209258	ANXA11
	SE_01_0034	SE_01_003400270	chr10	86966224	86973722	AGAP11
	SE_01_0034	SE_01_003400014	chr10	93421446	93483601	MYOF
	SE_01_0034	SE_01_003400102	chr10	99775082	99786793	ABCC2
	SE_01_0034	SE_01_003400346	chr10	99905792	99935133	NCRNA00093
	SE_01_0034	SE_01_003400126	chr10	99961244	100010656	DNMBP
	SE_01_0034	SE_01_003400155	chr11	102597593	102609526	MMP20
	SE_01_0034	SE_01_003400288	chr11	10509441	10561755	RNF141
	SE_01_0034	SE_01_003400064	chr11	10632526	10675167	MRVI1
	SE_01_0034	SE_01_003400029	chr11	118906508	118939589	BCL9L
	SE_01_0034	SE_01_003400075	chr11	122144137	122172013	MIR100
	SE_01_0034	SE_01_003400073	chr11	122175761	122199038	LOC399959
	SE_01_0034	SE_01_003400323	chr11	27926315	27936589	MIR610
	SE_01_0034	SE_01_003400321	chr11	34623367	34656241	EHF
	SE_01_0034	SE_01_003400218	chr11	57771688	57783178	CTNND1
	SE_01_0034	SE_01_003400313	chr11	59536649	59567133	OR4D9
	SE_01_0034	SE_01_003400099	chr11	62538602	62575469	AHNAK
	SE_01_0034	SE_01_003400249	chr11	64237849	64248678	FKBP2
	SE_01_0034	SE_01_003400268	chr11	64835759	64879812	CDC42BPG
	SE_01_0034	SE_01_003400152	chr11	65416525	65428901	NEAT1
	SE_01_0034	SE_01_003400038	chr11	65471090	65509086	MALAT1
	SE_01_0034	SE_01_003400108	chr11	65887151	65904662	FOSL1
	SE_01_0034	SE_01_003400122	chr11	65910619	65920665	C11orf68
	SE_01_0034	SE_01_003400153	chr11	67345354	67381401	POLD4
	SE_01_0034	SE_01_003400225	chr11	69281083	69303350	MYEOV
	SE_01_0034	SE_01_003400340	chr11	69635819	69655581	CCND1
	SE_01_0034	SE_01_003400261	chr11	9357149	9365474	IPO7
	SE_01_0034	SE_01_003400324	chr12	104217988	104221519	TXNRD1
	SE_01_0034	SE_01_003400283	chr12	104271591	104300544	TXNRD1
	SE_01_0034	SE_01_003400111	chr12	108823205	108857652	SSH1
	SE_01_0034	SE_01_003400042	chr12	116491341	116540513	NCRNA00173
	SE_01_0034	SE_01_003400244	chr12	120227951	120263643	PXN
	SE_01_0034	SE_01_003400229	chr12	121791328	121804270	RHOF
	SE_01_0034	SE_01_003400296	chr12	122880820	122898859	VPS37B
	SE_01_0034	SE_01_003400065	chr12	124904344	124941668	UBC
	SE_01_0034	SE_01_003400245	chr12	12716286	12727310	APOLD1
	SE_01_0034	SE_01_003400082	chr12	12869559	12904950	GPRC5A
	SE_01_0034	SE_01_003400357	chr12	15682282	15733315	EPS8
	SE_01_0034	SE_01_003400353	chr12	31730737	31764263	AMN1
	SE_01_0034	SE_01_003400312	chr12	46357036	46387297	SLC38A2
	SE_01_0034	SE_01_003400076	chr12	46429289	46475513	SLC38A2
	SE_01_0034	SE_01_003400188	chr12	46547212	46558643	SLC38A2
	SE_01_0034	SE_01_003400149	chr12	50200946	50225364	LIMA1
	SE_01_0034	SE_01_003400101	chr12	52143227	52164893	KRT80
	SE_01_0034	SE_01_003400163	chr12	52923526	52928746	KRT8
	SE_01_0034	SE_01_003400150	chr12	53344645	53388799	SP1
	SE_01_0034	SE_01_003400109	chr12	6362167	6378325	SCNN1A
	SE_01_0034	SE_01_003400232	chr12	6530549	6541443	GAPDH
	SE_01_0034	SE_01_003400018	chr12	65425058	65540706	MSRB3
	SE_01_0034	SE_01_003400365	chr12	65601733	65610668	HMGA2
	SE_01_0034	SE_01_003400044	chr12	65629462	65673946	HMGA2
	SE_01_0034	SE_01_003400338	chr12	65718653	65730796	HMGA2
	SE_01_0034	SE_01_003400023	chr12	65817155	65910391	RPSAP52
	SE_01_0034	SE_01_003400356	chr12	65926286	65953333	RPSAP52
	SE_01_0034	SE_01_003400171	chr12	6960400	6972503	SCARNA12
	SE_01_0034	SE_01_003400032	chr12	75621938	75669562	KRR1
	SE_01_0034	SE_01_003400016	chr12	75693830	75798529	KRR1
	SE_01_0034	SE_01_003400118	chr12	75850082	75914379	PHLDA1
	SE_01_0034	SE_01_003400059	chr12	75932016	75997498	PHLDA1
	SE_01_0034	SE_01_003400113	chr12	76017250	76038783	PHLDA1
	SE_01_0034	SE_01_003400347	chr12	88498547	88581420	KITLG
	SE_01_0034	SE_01_003400020	chr12	88917133	88971952	KITLG
	SE_01_0034	SE_01_003400335	chr12	95168926	95206792	FGD6
	SE_01_0034	SE_01_003400178	chr13	109242269	109275588	IRS2
	SE_01_0034	SE_01_003400182	chr13	110943464	110974082	ANKRD10
	SE_01_0034	SE_01_003400234	chr13	44300476	44315295	SERP2
	SE_01_0034	SE_01_003400181	chr13	97252665	97280455	MBNL2
	SE_01_0034	SE_01_003400287	chr14	104665080	104691097	INF2
	SE_01_0034	SE_01_003400345	chr14	49861190	49912765	ARF6
	SE_01_0034	SE_01_003400154	chr14	49998849	50014776	C14orf182
	SE_01_0034	SE_01_003400263	chr14	55101763	55109300	LGALS3
	SE_01_0034	SE_01_003400112	chr14	68778461	68798197	ZFP36L1
	SE_01_0034	SE_01_003400299	chr14	76946458	76963085	C14orf4
	SE_01_0034	SE_01_003400070	chr15	100710137	100734523	ASB7
	SE_01_0034	SE_01_003400187	chr15	59267887	59306443	LDHAL6B
	SE_01_0034	SE_01_003400054	chr15	60361143	60400790	ANXA2
	SE_01_0034	SE_01_003400098	chr15	67090300	67128665	SMAD3
	SE_01_0034	SE_01_003400366	chr15	71293438	71297490	THSD4
	SE_01_0034	SE_01_003400352	chr15	75449948	75456743	SIN3A
	SE_01_0034	SE_01_003400286	chr15	92800380	92833206	ASB9P1
	SE_01_0034	SE_01_003400303	chr15	92898375	92908077	MIR3175
	SE_01_0034	SE_01_003400228	chr16	2148417	2157450	SNORD60
	SE_01_0034	SE_01_003400259	chr16	30188353	30209785	CORO1A
	SE_01_0034	SE_01_003400131	chr16	3019640	3024831	THOC6
	SE_01_0034	SE_01_003400173	chr16	69039452	69079086	HAS3
	SE_01_0034	SE_01_003400053	chr16	69391608	69478488	CYB5B
	SE_01_0034	SE_01_003400280	chr16	69512746	69533858	NFAT5
	SE_01_0034	SE_01_003400349	chr16	89556866	89566735	SNORD68
	SE_01_0034	SE_01_003400127	chr16	89993234	89997434	DBNDD1
	SE_01_0034	SE_01_003400137	chr17	15944864	15967327	ADORA2B
	SE_01_0034	SE_01_003400206	chr17	16860146	16867653	KRT16P2
	SE_01_0034	SE_01_003400135	chr17	17008030	17045510	MPRIP
	SE_01_0034	SE_01_003400139	chr17	17811315	17850597	SREBF1
	SE_01_0034	SE_01_003400160	chr17	2391771	2408508	MNT
	SE_01_0034	SE_01_003400222	chr17	28718622	28729953	SNORD4B
	SE_01_0034	SE_01_003400297	chr17	28806408	28813947	C17orf63
	SE_01_0034	SE_01_003400310	chr17	38275420	38287684	MRPL45
	SE_01_0034	SE_01_003400175	chr17	40900935	40923415	KRT23
	SE_01_0034	SE_01_003400123	chr17	40946575	40960332	KRT39
	SE_01_0034	SE_01_003400145	chr17	41518682	41531370	KRT19
	SE_01_0034	SE_01_003400208	chr17	41771631	41801937	JUP
	SE_01_0034	SE_01_003400200	chr17	44812612	44833413	GJC1
	SE_01_0034	SE_01_003400298	chr17	47501527	47513660	MRPL45P2
	SE_01_0034	SE_01_003400205	chr17	48235280	48266507	MIR1203
	SE_01_0034	SE_01_003400262	chr17	48470242	48491285	HOXB1
	SE_01_0034	SE_01_003400078	chr17	50049424	50067710	ITGA3
	SE_01_0034	SE_01_003400307	chr17	51119174	51125216	SPAG9
	SE_01_0034	SE_01_003400050	chr17	57860278	57956961	CUEDC1
	SE_01_0034	SE_01_003400273	chr17	57985177	58008612	VEZF1
	SE_01_0034	SE_01_003400040	chr17	59748915	59791380	TMEM49
	SE_01_0034	SE_01_003400013	chr17	59825125	59853939	MIR21
	SE_01_0034	SE_01_003400028	chr17	64622382	64733751	SMURF2
	SE_01_0034	SE_01_003400210	chr17	67417891	67442354	PITPNC1
	SE_01_0034	SE_01_003400201	chr17	72370586	72424087	LOC100499467
	SE_01_0034	SE_01_003400220	chr17	73290410	73312871	CDC42EP4
	SE_01_0034	SE_01_003400141	chr17	75077184	75097091	SLC16A5
	SE_01_0034	SE_01_003400278	chr17	75113631	75136145	NT5C
	SE_01_0034	SE_01_003400140	chr17	75674396	75724101	ITGB4
	SE_01_0034	SE_01_003400344	chr17	75775037	75786751	H3F3B
	SE_01_0034	SE_01_003400215	chr17	75869194	75890396	TRIM47
	SE_01_0034	SE_01_003400071	chr17	77279245	77334123	SEPT9
	SE_01_0034	SE_01_003400185	chr17	78300586	78354597	SOCS3
	SE_01_0034	SE_01_003400246	chr17	81036637	81066114	BAIAP2
	SE_01_0034	SE_01_003400240	chr17	81364896	81401074	BAHCC1
	SE_01_0034	SE_01_003400277	chr17	8150127	8164661	PER1
	SE_01_0034	SE_01_003400216	chr17	81507468	81520607	ACTG1
	SE_01_0034	SE_01_003400191	chr17	81857354	81874465	ARHGDIA
	SE_01_0034	SE_01_003400121	chr17	82204460	82248552	SLC16A3
	SE_01_0034	SE_01_003400331	chr17	927275	938985	NXN
	SE_01_0034	SE_01_003400354	chr18	26477017	26488228	KCTD1
	SE_01_0034	SE_01_003400336	chr18	3445989	3463372	TGIF1
	SE_01_0034	SE_01_003400012	chr18	3592307	3631143	FLJ35776
	SE_01_0034	SE_01_003400105	chr18	3648009	3671762	FLJ35776
	SE_01_0034	SE_01_003400358	chr18	70279090	70312084	SOCS6
	SE_01_0034	SE_01_003400068	chr18	70355851	70386239	SOCS6
	SE_01_0034	SE_01_003400332	chr19	11084805	11096026	LDLR
	SE_01_0034	SE_01_003400290	chr19	1165389	1190398	SBNO2
	SE_01_0034	SE_01_003400255	chr19	1243168	1256297	MIDN
	SE_01_0034	SE_01_003400184	chr19	12765645	12797108	HOOK2
	SE_01_0034	SE_01_003400069	chr19	13140445	13173438	IER2
	SE_01_0034	SE_01_003400267	chr19	13837886	13845696	MIR23A
	SE_01_0034	SE_01_003400177	chr19	13845749	13855918	MIR23A
	SE_01_0034	SE_01_003400090	chr19	15823951	15839826	UCA1
	SE_01_0034	SE_01_003400253	chr19	1744701	1774188	ONECUT3
	SE_01_0034	SE_01_003400231	chr19	18278486	18307939	MIR3188
	SE_01_0034	SE_01_003400257	chr19	2028328	2062768	MKNK2
	SE_01_0034	SE_01_003400300	chr19	2494391	2544598	GADD45B
	SE_01_0034	SE_01_003400320	chr19	36127291	36142228	CAPNS1
	SE_01_0034	SE_01_003400041	chr19	38635896	38695771	ACTN4
	SE_01_0034	SE_01_003400087	chr19	39396906	39413298	ZFP36
	SE_01_0034	SE_01_003400241	chr19	40587910	40626129	LTBP4
	SE_01_0034	SE_01_003400289	chr19	40714230	40720072	ITPKC
	SE_01_0034	SE_01_003400317	chr19	42241543	42284401	ERF
	SE_01_0034	SE_01_003400058	chr19	43738628	43786116	C19orf61
	SE_01_0034	SE_01_003400269	chr19	46840570	46926438	AP2S1
	SE_01_0034	SE_01_003400350	chr19	48632225	48639518	DBP
	SE_01_0034	SE_01_003400254	chr19	49486790	49498291	SNORD35A
	SE_01_0034	SE_01_003400094	chr2	110096957	110117104	MALL
	SE_01_0034	SE_01_003400316	chr2	111482884	111497897	LOC541471
	SE_01_0034	SE_01_003400168	chr2	156331766	156345626	NR4A2
	SE_01_0034	SE_01_003400062	chr2	168182869	168226403	STK39
	SE_01_0034	SE_01_003400227	chr2	177240548	177266150	MIR3128
	SE_01_0034	SE_01_003400030	chr2	181776022	181821589	SSFA2
	SE_01_0034	SE_01_003400046	chr2	181874581	181959880	SSFA2
	SE_01_0034	SE_01_003400333	chr2	188290598	188314925	MIR561
	SE_01_0034	SE_01_003400266	chr2	201146456	201158749	CASP10
	SE_01_0034	SE_01_003400057	chr2	219684013	219729898	SLC4A3
	SE_01_0034	SE_01_003400117	chr2	223522525	223578084	SCG2
	SE_01_0034	SE_01_003400186	chr2	223695588	223702557	SCG2
	SE_01_0034	SE_01_003400202	chr2	226029691	226080927	KIAA1486
	SE_01_0034	SE_01_003400011	chr2	226113215	226217161	IRS1
	SE_01_0034	SE_01_003400037	chr2	226637160	226675282	IRS1
	SE_01_0034	SE_01_003400132	chr2	226754116	226803001	IRS1
	SE_01_0034	SE_01_003400326	chr2	230773133	230795491	CAB39
	SE_01_0034	SE_01_003400036	chr2	231603854	231682183	C2orf57
	SE_01_0034	SE_01_003400161	chr2	231701513	231715801	PTMA
	SE_01_0034	SE_01_003400170	chr2	239245549	239281064	MIR4269
	SE_01_0034	SE_01_003400224	chr2	62568346	62580609	TMEM17
	SE_01_0034	SE_01_003400319	chr2	64830165	64841338	LOC400958
	SE_01_0034	SE_01_003400247	chr2	70070146	70090710	LOC400960
	SE_01_0034	SE_01_003400067	chr2	84904759	84975958	KCMF1
	SE_01_0034	SE_01_003400309	chr2	87452629	87467319	NCRNA00152
	SE_01_0034	SE_01_003400279	chr20	17556463	17571145	BFSP1
	SE_01_0034	SE_01_003400104	chr20	31543965	31574918	PSIMCT-1
	SE_01_0034	SE_01_003400072	chr20	31590764	31612470	ID1
	SE_01_0034	SE_01_003400049	chr20	31661384	31741121	BCL2L1
	SE_01_0034	SE_01_003400207	chr20	35303997	35328183	FAM83C
	SE_01_0034	SE_01_003400096	chr20	3788200	3821842	CDC25B
	SE_01_0034	SE_01_003400301	chr20	41001350	41010382	TOP1
	SE_01_0034	SE_01_003400327	chr20	47314874	47332800	LOC100131496
	SE_01_0034	SE_01_003400308	chr20	50534302	50543202	PTPN1
	SE_01_0034	SE_01_003400162	chr20	50723964	50747396	PARD6B
	SE_01_0034	SE_01_003400343	chr20	51737042	51768402	ATP9A
	SE_01_0034	SE_01_003400258	chr20	53609393	53624832	ZNF217
	SE_01_0034	SE_01_003400022	chr20	54121414	54178064	CYP24A1
	SE_01_0034	SE_01_003400342	chr20	62349087	62367433	LAMA5
	SE_01_0034	SE_01_003400048	chr20	62703117	62744395	NTSR1
	SE_01_0034	SE_01_003400251	chr22	24199740	24210380	SUSD2
	SE_01_0034	SE_01_003400033	chr22	30195073	30259121	LIF
	SE_01_0034	SE_01_003400271	chr22	30408214	30445628	MTFP1
	SE_01_0034	SE_01_003400209	chr22	37186091	37200452	C1QTNF6
	SE_01_0034	SE_01_003400097	chr22	37303688	37332922	CYTH4
	SE_01_0034	SE_01_003400265	chr22	37744212	37754332	TRIOBP
	SE_01_0034	SE_01_003400066	chr22	46064632	46087656	LOC400931
	SE_01_0034	SE_01_003400355	chr3	110566451	110585363	PVRL3
	SE_01_0034	SE_01_003400250	chr3	111579761	111612070	ZBED2
	SE_01_0034	SE_01_003400027	chr3	111889375	111988954	ABHD10
	SE_01_0034	SE_01_003400128	chr3	114627531	114660858	ZBTB20
	SE_01_0034	SE_01_003400045	chr3	139297927	139327426	MRPS22
	SE_01_0034	SE_01_003400133	chr3	149572505	149588063	WWTR1
	SE_01_0034	SE_01_003400089	chr3	156811093	156828419	LEKR1
	SE_01_0034	SE_01_003400235	chr3	32417559	32423014	CMTM7
	SE_01_0034	SE_01_003400147	chr3	45091718	45141908	CDCP1
	SE_01_0034	SE_01_003400361	chr3	4977024	4996602	BHLHE40
	SE_01_0034	SE_01_003400322	chr3	98511502	98524091	CLDND1
	SE_01_0034	SE_01_003400328	chr3	98535689	98547097	GPR15
	SE_01_0034	SE_01_003400114	chr3	98550971	98559446	GPR15
	SE_01_0034	SE_01_003400107	chr3	98823112	98924217	DCBLD2
	SE_01_0034	SE_01_003400035	chr3	98951649	98986723	DCBLD2
	SE_01_0034	SE_01_003400034	chr4	101101384	101184792	PPP3CA
	SE_01_0034	SE_01_003400051	chr4	11488097	11551247	HS3ST1
	SE_01_0034	SE_01_003400024	chr4	11602386	11653714	HS3ST1
	SE_01_0034	SE_01_003400195	chr4	11696131	11725576	HS3ST1
	SE_01_0034	SE_01_003400019	chr4	168477305	168605751	PALLD
	SE_01_0034	SE_01_003400077	chr4	186804487	186847911	FAT1
	SE_01_0034	SE_01_003400183	chr4	186926605	186938094	FAT1
	SE_01_0034	SE_01_003400001	chr4	30713977	30975605	PCDH7
	SE_01_0034	SE_01_003400039	chr4	31011876	31108505	PCDH7
	SE_01_0034	SE_01_003400074	chr4	74361206	74419273	EREG
	SE_01_0034	SE_01_003400285	chr4	74531741	74560466	AREG
	SE_01_0034	SE_01_003400015	chr4	74608364	74683859	BTC
	SE_01_0034	SE_01_003400081	chr4	78529603	78570433	ANXA3
	SE_01_0034	SE_01_003400100	chr5	115895295	115941916	AQPEP
	SE_01_0034	SE_01_003400330	chr5	134502811	134528186	PHF15
	SE_01_0034	SE_01_003400119	chr5	142324334	142368356	SPRY4
	SE_01_0034	SE_01_003400315	chr5	149516384	149564284	CSNK1A1
	SE_01_0034	SE_01_003400136	chr5	76784974	76840062	F2RL1
	SE_01_0034	SE_01_003400110	chr6	129488825	129503468	ARHGAP18
	SE_01_0034	SE_01_003400103	chr6	129640524	129693131	ARHGAP18
	SE_01_0034	SE_01_003400306	chr6	142006978	142015909	NMBR
	SE_01_0034	SE_01_003400221	chr6	144796404	144821321	UTRN
	SE_01_0034	SE_01_003400061	chr6	144893820	144932322	UTRN
	SE_01_0034	SE_01_003400156	chr6	14731621	14745020	JARID2
	SE_01_0034	SE_01_003400025	chr6	151012153	151095911	AKAP12
	SE_01_0034	SE_01_003400360	chr6	158631075	158657491	DYNLT1
	SE_01_0034	SE_01_003400005	chr6	158685998	158820724	MIR3918
	SE_01_0034	SE_01_003400047	chr6	158838064	158871263	OSTCL
	SE_01_0034	SE_01_003400148	chr6	26024910	26035443	HIST1H3B
	SE_01_0034	SE_01_003400284	chr6	26051968	26066820	HIST1H1C
	SE_01_0034	SE_01_003400233	chr6	26120025	26127473	HIST1H2BC
	SE_01_0034	SE_01_003400248	chr6	26152233	26173814	HIST1H2BD
	SE_01_0034	SE_01_003400359	chr6	27130503	27135513	HIST1H2AG
	SE_01_0034	SE_01_003400282	chr6	27888985	27896244	HIST1H2AM
	SE_01_0034	SE_01_003400197	chr6	30746647	30754109	IER3
	SE_01_0034	SE_01_003400174	chr6	30804870	30828886	DDR1
	SE_01_0034	SE_01_003400203	chr6	32966700	32974110	BRD2
	SE_01_0034	SE_01_003400095	chr6	34223149	34249513	HMGA1
	SE_01_0034	SE_01_003400304	chr6	42098794	42143396	C6orf132
	SE_01_0034	SE_01_003400120	chr6	56708632	56764888	DST
	SE_01_0034	SE_01_003400219	chr6	6780964	6827548	LY86-AS1
	SE_01_0034	SE_01_003400213	chr6	73513026	73524845	EEF1A1
	SE_01_0034	SE_01_003400190	chr6	73566688	73587149	EEF1A1
	SE_01_0034	SE_01_003400341	chr6	73694212	73715319	CD109
	SE_01_0034	SE_01_003400106	chr7	116394758	116478449	CAV2
	SE_01_0034	SE_01_003400083	chr7	116494833	116528926	CAV2
	SE_01_0034	SE_01_003400086	chr7	116670581	116717600	MET
	SE_01_0034	SE_01_003400204	chr7	121277799	121314749	WNT16
	SE_01_0034	SE_01_003400291	chr7	121328562	121399236	FAM3C
	SE_01_0034	SE_01_003400260	chr7	121528438	121558425	FAM3C
	SE_01_0034	SE_01_003400003	chr7	130871793	130928601	LOC646329
	SE_01_0034	SE_01_003400157	chr7	130992866	131002192	LOC646329
	SE_01_0034	SE_01_003400180	chr7	131006130	131017502	FLJ43663
	SE_01_0034	SE_01_003400151	chr7	158801957	158824654	ESYT2
	SE_01_0034	SE_01_003400256	chr7	22853596	22861620	SNORD93
	SE_01_0034	SE_01_003400237	chr7	27160626	27174765	MIR196B
	SE_01_0034	SE_01_003400198	chr7	32657349	32680887	DPY19L1P1
	SE_01_0034	SE_01_003400230	chr7	34991319	35005905	DPY19L1
	SE_01_0034	SE_01_003400164	chr7	5417565	5430622	TNRC18
	SE_01_0034	SE_01_003400292	chr7	55127141	55135275	EGFR
	SE_01_0034	SE_01_003400192	chr7	6430337	6454587	DAGLB
	SE_01_0034	SE_01_003400167	chr7	73798824	73835155	CLDN4
	SE_01_0034	SE_01_003400179	chr7	80271688	80285356	GNAI1
	SE_01_0034	SE_01_003400217	chr7	812517	836677	SUN1
	SE_01_0034	SE_01_003400142	chr8	102787841	102811844	AZIN1
	SE_01_0034	SE_01_003400052	chr8	125109935	125193944	NSMCE2
	SE_01_0034	SE_01_003400143	chr8	125212176	125232168	NSMCE2
	SE_01_0034	SE_01_003400093	chr8	125258747	125303511	TRIB1
	SE_01_0034	SE_01_003400165	chr8	125425524	125464921	TRIB1
	SE_01_0034	SE_01_003400006	chr8	125636725	125702887	TRIB1
	SE_01_0034	SE_01_003400004	chr8	127204040	127308641	POU5F1B
	SE_01_0034	SE_01_003400252	chr8	127732766	127744149	MYC
	SE_01_0034	SE_01_003400363	chr8	127849982	127860563	MIR1204
	SE_01_0034	SE_01_003400063	chr8	129681544	129712427	GSDMC
	SE_01_0034	SE_01_003400134	chr8	143569373	143580139	C8orf73
	SE_01_0034	SE_01_003400031	chr8	143933103	143954661	PLEC
	SE_01_0034	SE_01_003400115	chr8	17835471	17856902	MTUS1
	SE_01_0034	SE_01_003400337	chr8	29654988	29676679	C8orf75
	SE_01_0034	SE_01_003400236	chr8	38995230	39005456	ADAM9
	SE_01_0034	SE_01_003400364	chr8	39031884	39042629	ADAM9
	SE_01_0034	SE_01_003400092	chr8	61749217	61769409	ASPH
	SE_01_0034	SE_01_003400125	chr8	6546178	6603934	ANGPT2
	SE_01_0034	SE_01_003400194	chr8	8287615	8311646	FLJ10661
	SE_01_0034	SE_01_003400002	chr8	93818722	93944851	PDP1
	SE_01_0034	SE_01_003400314	chr9	107238107	107249767	RAD23B
	SE_01_0034	SE_01_003400084	chr9	129476475	129509751	C9orf50
	SE_01_0034	SE_01_003400129	chr9	129548493	129611680	C9orf50
	SE_01_0034	SE_01_003400010	chr9	21504586	21618056	LOC554202
	SE_01_0034	SE_01_003400026	chr9	21667918	21713300	MTAP
	SE_01_0034	SE_01_003400124	chr9	21770476	21814261	MTAP
	SE_01_0034	SE_01_003400226	chr9	37462987	37478222	ZBTB5
	SE_01_0034	SE_01_003400325	chrX	40130022	40177328	BCOR
	SE_01_0034	SE_01_003400008	chrX	45697362	45853317	MIR222
	SE_01_0034	SE_01_003400189	chrX	46315522	46334008	ZNF673

## Sheet: HT29
Table S1 List of 859 selected SE-related genes in HT29 cell lines from SEdb
cell line	chr	start	end	SE ID	sample_ID	closest gene
HT29	chr1	1004243	1080730	SE_02_035300043	SE_02_0353	AGRN
	chr1	10679634	10704601	SE_02_035300658	SE_02_0353	CASZ1
	chr1	10756002	10805189	SE_02_035300127	SE_02_0353	CASZ1
	chr1	111193152	111205724	SE_02_035300758	SE_02_0353	DENND2D
	chr1	112390420	112398163	SE_02_035300692	SE_02_0353	CTTNBP2NL
	chr1	1141507	1146111	SE_02_035300527	SE_02_0353	MIR200B
	chr1	1157449	1172747	SE_02_035300130	SE_02_0353	MIR200B
	chr1	12574052	12620018	SE_02_035300290	SE_02_0353	DHRS3
	chr1	1429648	1438828	SE_02_035300460	SE_02_0353	VWA1
	chr1	149838338	149845843	SE_02_035300324	SE_02_0353	HIST2H2AA4
	chr1	149848198	149855479	SE_02_035300315	SE_02_0353	HIST2H2BC
	chr1	150560137	150579740	SE_02_035300620	SE_02_0353	MCL1
	chr1	151508697	151517058	SE_02_035300405	SE_02_0353	CGN
	chr1	151538143	151549770	SE_02_035300521	SE_02_0353	MIR554
	chr1	151934063	151948426	SE_02_035300664	SE_02_0353	THEM4
	chr1	151968123	152002004	SE_02_035300342	SE_02_0353	S100A10
	chr1	152022994	152049878	SE_02_035300437	SE_02_0353	S100A11
	chr1	153531538	153539427	SE_02_035300546	SE_02_0353	S100A6
	chr1	153563396	153569313	SE_02_035300586	SE_02_0353	S100A2
	chr1	15408805	15428043	SE_02_035300487	SE_02_0353	EFHD2
	chr1	154969963	154976882	SE_02_035300481	SE_02_0353	SHC1
	chr1	154999009	155018417	SE_02_035300473	SE_02_0353	ZBTB7B
	chr1	155125271	155136570	SE_02_035300328	SE_02_0353	EFNA1
	chr1	155961580	156009684	SE_02_035300093	SE_02_0353	ARHGEF2
	chr1	156090509	156132342	SE_02_035300012	SE_02_0353	LMNA
	chr1	156490295	156506346	SE_02_035300627	SE_02_0353	MEF2D
	chr1	156689644	156710907	SE_02_035300541	SE_02_0353	CRABP2
	chr1	156745707	156751506	SE_02_035300568	SE_02_0353	HDGF
	chr1	15832670	15851032	SE_02_035300480	SE_02_0353	SPEN
	chr1	159907037	159938511	SE_02_035300236	SE_02_0353	TAGLN2
	chr1	16137163	16190337	SE_02_035300013	SE_02_0353	EPHA2
	chr1	16761886	16791355	SE_02_035300185	SE_02_0353	MST1P9
	chr1	17183849	17251951	SE_02_035300192	SE_02_0353	PADI1
	chr1	17515668	17625449	SE_02_035300040	SE_02_0353	ARHGEF10L
	chr1	181104290	181135756	SE_02_035300720	SE_02_0353	IER5
	chr1	18642788	18672025	SE_02_035300462	SE_02_0353	PAX7
	chr1	19005452	19030309	SE_02_035300218	SE_02_0353	IFFO2
	chr1	19061824	19087482	SE_02_035300549	SE_02_0353	IFFO2
	chr1	19253140	19289545	SE_02_035300816	SE_02_0353	AKR7L
	chr1	200890546	200909024	SE_02_035300472	SE_02_0353	C1orf106
	chr1	202006224	202088963	SE_02_035300026	SE_02_0353	ELF3
	chr1	202105001	202119126	SE_02_035300459	SE_02_0353	GPR37L1
	chr1	203315628	203328684	SE_02_035300815	SE_02_0353	BTG2
	chr1	204073532	204105460	SE_02_035300751	SE_02_0353	SOX13
	chr1	204478686	204508688	SE_02_035300614	SE_02_0353	PIK3C2B
	chr1	205438905	205451662	SE_02_035300781	SE_02_0353	MIR135B
	chr1	206999090	207034371	SE_02_035300071	SE_02_0353	C1orf116
	chr1	209648850	209656571	SE_02_035300737	SE_02_0353	LAMB3
	chr1	212464066	212489875	SE_02_035300392	SE_02_0353	NENF
	chr1	21319351	21340871	SE_02_035300819	SE_02_0353	ECE1
	chr1	21606896	21641077	SE_02_035300276	SE_02_0353	RAP1GAP
	chr1	2189008	2213956	SE_02_035300798	SE_02_0353	C1orf86
	chr1	21896031	21940222	SE_02_035300123	SE_02_0353	HSPG2
	chr1	21955056	22020182	SE_02_035300164	SE_02_0353	CELA3B
	chr1	225863945	225908964	SE_02_035300122	SE_02_0353	LEFTY1
	chr1	226109273	226136910	SE_02_035300119	SE_02_0353	LOC440926
	chr1	228129548	228152287	SE_02_035300598	SE_02_0353	GUK1
	chr1	228825773	228867572	SE_02_035300749	SE_02_0353	RHOU
	chr1	229092347	229142772	SE_02_035300661	SE_02_0353	RAB4A
	chr1	234598373	234643714	SE_02_035300135	SE_02_0353	NCRNA00184
	chr1	234699671	234728317	SE_02_035300331	SE_02_0353	NCRNA00184
	chr1	234791203	234825347	SE_02_035300155	SE_02_0353	NCRNA00184
	chr1	234848830	234877030	SE_02_035300710	SE_02_0353	NCRNA00184
	chr1	234954168	235014040	SE_02_035300032	SE_02_0353	SNORA14B
	chr1	23789469	23802356	SE_02_035300205	SE_02_0353	GALE
	chr1	23950952	23985336	SE_02_035300552	SE_02_0353	PNRC2
	chr1	24008160	24028338	SE_02_035300206	SE_02_0353	SRSF10
	chr1	24101741	24121848	SE_02_035300288	SE_02_0353	MYOM3
	chr1	2575015	2594624	SE_02_035300718	SE_02_0353	C1orf93
	chr1	26275324	26285651	SE_02_035300671	SE_02_0353	SH3BGRL3
	chr1	26335955	26360425	SE_02_035300514	SE_02_0353	AIM1L
	chr1	26986381	27013482	SE_02_035300184	SE_02_0353	TRNP1
	chr1	27517336	27604419	SE_02_035300160	SE_02_0353	AHDC1
	chr1	31548227	31592495	SE_02_035300173	SE_02_0353	TINAGL1
	chr1	32712366	32770431	SE_02_035300131	SE_02_0353	KIAA1522
	chr1	3454615	3484015	SE_02_035300465	SE_02_0353	ARHGEF16
	chr1	36372505	36402205	SE_02_035300396	SE_02_0353	STK40
	chr1	37470883	37487201	SE_02_035300221	SE_02_0353	ZC3H12A
	chr1	39391725	39411718	SE_02_035300702	SE_02_0353	KIAA0754
	chr1	42923065	43013671	SE_02_035300007	SE_02_0353	SLC2A1
	chr1	43522711	43559153	SE_02_035300327	SE_02_0353	PTPRF
	chr1	44804980	44811219	SE_02_035300415	SE_02_0353	BTBD19
	chr1	46170840	46189552	SE_02_035300266	SE_02_0353	TSPAN1
	chr1	46515231	46531800	SE_02_035300731	SE_02_0353	DMBX1
	chr1	58800473	58825497	SE_02_035300526	SE_02_0353	LOC100131060
	chr1	58873207	58911447	SE_02_035300374	SE_02_0353	LOC100131060
	chr1	8004643	8099273	SE_02_035300079	SE_02_0353	ERRFI1
	chr1	8153604	8218092	SE_02_035300114	SE_02_0353	SLC45A1
	chr1	93578491	93594799	SE_02_035300284	SE_02_0353	LOC100129046
	chr1	93613482	93623262	SE_02_035300712	SE_02_0353	LOC100129046
	chr1	93691980	93704676	SE_02_035300791	SE_02_0353	BCAR3
	chr10	100362670	100376751	SE_02_035300355	SE_02_0353	NCRNA00263
	chr10	100995621	101013124	SE_02_035300763	SE_02_0353	LZTS2
	chr10	101028559	101044050	SE_02_035300755	SE_02_0353	SFXN3
	chr10	112360583	112406515	SE_02_035300232	SE_02_0353	ACSL5
	chr10	113056043	113097313	SE_02_035300655	SE_02_0353	TCF7L2
	chr10	113944419	113962930	SE_02_035300417	SE_02_0353	ADRB1
	chr10	114488950	114545624	SE_02_035300535	SE_02_0353	ABLIM1
	chr10	11873986	11883686	SE_02_035300842	SE_02_0353	C10orf47
	chr10	120962241	121003762	SE_02_035300353	SE_02_0353	LOC283089
	chr10	122289738	122312289	SE_02_035300495	SE_02_0353	BTBD16
	chr10	125146346	125159327	SE_02_035300771	SE_02_0353	CTBP2
	chr10	132394897	132430407	SE_02_035300074	SE_02_0353	PWWP2B
	chr10	30418287	30436690	SE_02_035300360	SE_02_0353	MAP3K8
	chr10	31926784	31948422	SE_02_035300685	SE_02_0353	ARHGAP12
	chr10	32938520	32985953	SE_02_035300498	SE_02_0353	ITGB1
	chr10	3464143	3487760	SE_02_035300647	SE_02_0353	PITRM1
	chr10	3754239	3788302	SE_02_035300370	SE_02_0353	KLF6
	chr10	3802384	3812458	SE_02_035300401	SE_02_0353	KLF6
	chr10	3850360	3907161	SE_02_035300483	SE_02_0353	KLF6
	chr10	4050902	4069931	SE_02_035300687	SE_02_0353	KLF6
	chr10	43395171	43421652	SE_02_035300421	SE_02_0353	HNRNPF
	chr10	4686112	4737415	SE_02_035300609	SE_02_0353	LOC100216001
	chr10	5538326	5568440	SE_02_035300180	SE_02_0353	CALML3
	chr10	69385275	69468895	SE_02_035300139	SE_02_0353	TACR2
	chr10	72243632	72279015	SE_02_035300228	SE_02_0353	DDIT4
	chr10	72291647	72337333	SE_02_035300229	SE_02_0353	DDIT4
	chr10	79069110	79128364	SE_02_035300363	SE_02_0353	ZMIZ1
	chr10	79143579	79163680	SE_02_035300161	SE_02_0353	ZMIZ1
	chr10	80187200	80209092	SE_02_035300134	SE_02_0353	ANXA11
	chr10	86952968	86961350	SE_02_035300738	SE_02_0353	MMRN2
	chr10	91590285	91617929	SE_02_035300743	SE_02_0353	LOC100188947
	chr10	93421319	93476749	SE_02_035300118	SE_02_0353	MYOF
	chr10	93541759	93592479	SE_02_035300186	SE_02_0353	GPR120
	chr11	1040242	1082046	SE_02_035300088	SE_02_0353	MUC2
	chr11	10893192	10908766	SE_02_035300673	SE_02_0353	LOC729013
	chr11	111352627	111363560	SE_02_035300625	SE_02_0353	POU2AF1
	chr11	1128266	1160077	SE_02_035300636	SE_02_0353	MUC2
	chr11	117175662	117226509	SE_02_035300303	SE_02_0353	TAGLN
	chr11	118607604	118635613	SE_02_035300203	SE_02_0353	PHLDB1
	chr11	118906812	118930896	SE_02_035300014	SE_02_0353	BCL9L
	chr11	119092667	119104224	SE_02_035300629	SE_02_0353	H2AFX
	chr11	120119483	120138381	SE_02_035300190	SE_02_0353	TRIM29
	chr11	12118798	12184030	SE_02_035300094	SE_02_0353	MICAL2
	chr11	121458805	121479256	SE_02_035300770	SE_02_0353	SORL1
	chr11	12213315	12280141	SE_02_035300082	SE_02_0353	MICALCL
	chr11	123580710	123594828	SE_02_035300191	SE_02_0353	GRAMD1B
	chr11	124745704	124770958	SE_02_035300129	SE_02_0353	ESAM
	chr11	126091216	126133259	SE_02_035300458	SE_02_0353	CDON
	chr11	126336077	126437063	SE_02_035300006	SE_02_0353	ST3GAL4
	chr11	12674466	12698898	SE_02_035300373	SE_02_0353	TEAD1
	chr11	12719110	12727884	SE_02_035300812	SE_02_0353	TEAD1
	chr11	12797959	12865378	SE_02_035300282	SE_02_0353	TEAD1
	chr11	129313780	129325805	SE_02_035300566	SE_02_0353	BARX2
	chr11	129816935	129862815	SE_02_035300258	SE_02_0353	TMEM45B
	chr11	130143818	130191102	SE_02_035300096	SE_02_0353	ST14
	chr11	13097598	13144427	SE_02_035300823	SE_02_0353	RASSF10
	chr11	1546334	1574788	SE_02_035300234	SE_02_0353	DUSP8
	chr11	16945581	17016287	SE_02_035300090	SE_02_0353	PLEKHA7
	chr11	1754960	1784082	SE_02_035300708	SE_02_0353	MOB2
	chr11	1824658	1844956	SE_02_035300113	SE_02_0353	SYT8
	chr11	206121	210918	SE_02_035300830	SE_02_0353	RIC8A
	chr11	2091944	2104347	SE_02_035300523	SE_02_0353	MIR483
	chr11	27200093	27211539	SE_02_035300787	SE_02_0353	CCDC34
	chr11	2909758	2914480	SE_02_035300725	SE_02_0353	SLC22A18AS
	chr11	2926273	2935020	SE_02_035300272	SE_02_0353	PHLDA2
	chr11	33688587	33708214	SE_02_035300622	SE_02_0353	C11orf91
	chr11	34317187	34357992	SE_02_035300204	SE_02_0353	ABTB2
	chr11	34584684	34606649	SE_02_035300525	SE_02_0353	EHF
	chr11	34619874	34656007	SE_02_035300060	SE_02_0353	EHF
	chr11	36360320	36378506	SE_02_035300357	SE_02_0353	PRR5L
	chr11	393248	418216	SE_02_035300631	SE_02_0353	SIGIRR
	chr11	44559181	44613749	SE_02_035300211	SE_02_0353	CD82
	chr11	44976478	44981616	SE_02_035300607	SE_02_0353	LOC221122
	chr11	46271168	46282702	SE_02_035300259	SE_02_0353	CREB3L1
	chr11	47914277	47925507	SE_02_035300800	SE_02_0353	PTPRJ
	chr11	57310476	57326921	SE_02_035300350	SE_02_0353	TNKS1BP1
	chr11	57761103	57800866	SE_02_035300241	SE_02_0353	CTNND1
	chr11	605175	621820	SE_02_035300618	SE_02_0353	IRF7
	chr11	61688260	61707857	SE_02_035300450	SE_02_0353	DAGLA
	chr11	61727303	61773219	SE_02_035300168	SE_02_0353	C11orf9
	chr11	61959145	61986797	SE_02_035300467	SE_02_0353	FTH1
	chr11	62041216	62054765	SE_02_035300760	SE_02_0353	INCENP
	chr11	62537455	62561891	SE_02_035300033	SE_02_0353	AHNAK
	chr11	63553032	63584108	SE_02_035300734	SE_02_0353	HRASLS2
	chr11	64236638	64246803	SE_02_035300274	SE_02_0353	FKBP2
	chr11	64834708	64862353	SE_02_035300226	SE_02_0353	CDC42BPG
	chr11	64887453	64894691	SE_02_035300576	SE_02_0353	MIR192
	chr11	65379805	65387780	SE_02_035300505	SE_02_0353	SLC25A45
	chr11	65415961	65428995	SE_02_035300062	SE_02_0353	NEAT1
	chr11	65471019	65509135	SE_02_035300017	SE_02_0353	MALAT1
	chr11	65568739	65578198	SE_02_035300504	SE_02_0353	FAM89B
	chr11	65853862	65862014	SE_02_035300492	SE_02_0353	CFL1
	chr11	65890617	65917380	SE_02_035300545	SE_02_0353	FOSL1
	chr11	6602352	6610228	SE_02_035300839	SE_02_0353	ILK
	chr11	67262795	67293827	SE_02_035300616	SE_02_0353	ANKRD13D
	chr11	67344165	67382162	SE_02_035300046	SE_02_0353	POLD4
	chr11	67996675	68021580	SE_02_035300095	SE_02_0353	ALDH3B1
	chr11	68089051	68147809	SE_02_035300261	SE_02_0353	CHKA
	chr11	68296604	68355502	SE_02_035300039	SE_02_0353	LRP5
	chr11	69259259	69303235	SE_02_035300064	SE_02_0353	MYEOV
	chr11	69890173	69909959	SE_02_035300711	SE_02_0353	FGF3
	chr11	69939275	69971093	SE_02_035300615	SE_02_0353	ANO1
	chr11	70191648	70234671	SE_02_035300651	SE_02_0353	FADD
	chr11	702129	711937	SE_02_035300593	SE_02_0353	EPS8L2
	chr11	72776408	72790775	SE_02_035300251	SE_02_0353	STARD10
	chr11	73182448	73228012	SE_02_035300388	SE_02_0353	P2RY2
	chr11	73970191	73984319	SE_02_035300624	SE_02_0353	UCP2
	chr11	75318375	75345203	SE_02_035300741	SE_02_0353	MIR326
	chr11	7571707	7579486	SE_02_035300766	SE_02_0353	PPFIBP2
	chr11	760792	777494	SE_02_035300803	SE_02_0353	PDDC1
	chr11	76767276	76799896	SE_02_035300163	SE_02_0353	TSKU
	chr11	823822	839903	SE_02_035300189	SE_02_0353	CD151
	chr11	94525588	94547434	SE_02_035300482	SE_02_0353	FUT4
	chr11	9562650	9573459	SE_02_035300296	SE_02_0353	WEE1
	chr11	96036654	96115590	SE_02_035300788	SE_02_0353	MTMR2
	chr12	113237435	113248797	SE_02_035300432	SE_02_0353	TPCN1
	chr12	11860992	11887440	SE_02_035300339	SE_02_0353	BCL2L14
	chr12	120223449	120235609	SE_02_035300434	SE_02_0353	PXN
	chr12	122096117	122141460	SE_02_035300530	SE_02_0353	LRRC43
	chr12	122724687	122732260	SE_02_035300701	SE_02_0353	GPR81
	chr12	122860400	122899492	SE_02_035300102	SE_02_0353	VPS37B
	chr12	124352363	124397904	SE_02_035300397	SE_02_0353	FAM101A
	chr12	124505493	124521498	SE_02_035300085	SE_02_0353	NCOR2
	chr12	124537398	124551739	SE_02_035300659	SE_02_0353	NCOR2
	chr12	124654681	124701824	SE_02_035300597	SE_02_0353	NCOR2
	chr12	124904349	124941589	SE_02_035300174	SE_02_0353	UBC
	chr12	12713418	12727267	SE_02_035300453	SE_02_0353	CDKN1B
	chr12	12869501	12910881	SE_02_035300061	SE_02_0353	GPRC5A
	chr12	132426410	132454462	SE_02_035300719	SE_02_0353	FBRSL1
	chr12	14769120	14778033	SE_02_035300802	SE_02_0353	H2AFJ
	chr12	15687987	15736852	SE_02_035300811	SE_02_0353	EPS8
	chr12	26100018	26135742	SE_02_035300283	SE_02_0353	BHLHE41
	chr12	26226387	26276278	SE_02_035300103	SE_02_0353	SSPN
	chr12	31317616	31340598	SE_02_035300722	SE_02_0353	FAM60A
	chr12	31353635	31372686	SE_02_035300448	SE_02_0353	FAM60A
	chr12	47740635	47759891	SE_02_035300679	SE_02_0353	RAPGEF3
	chr12	47808142	47829830	SE_02_035300852	SE_02_0353	HDAC7
	chr12	49942667	49967796	SE_02_035300513	SE_02_0353	AQP2
	chr12	502078	542574	SE_02_035300539	SE_02_0353	B4GALNT3
	chr12	50239233	50283529	SE_02_035300326	SE_02_0353	LIMA1
	chr12	52024840	52062698	SE_02_035300837	SE_02_0353	NR4A1
	chr12	52143015	52157786	SE_02_035300091	SE_02_0353	KRT80
	chr12	52184697	52195933	SE_02_035300414	SE_02_0353	KRT80
	chr12	52277051	52284261	SE_02_035300548	SE_02_0353	KRT81
	chr12	52859617	52994708	SE_02_035300002	SE_02_0353	KRT18
	chr12	53038808	53067149	SE_02_035300278	SE_02_0353	LOC283335
	chr12	53216172	53234376	SE_02_035300681	SE_02_0353	RARG
	chr12	54133569	54153766	SE_02_035300524	SE_02_0353	LOC400043
	chr12	56628480	56637073	SE_02_035300824	SE_02_0353	BAZ2A
	chr12	6180171	6236629	SE_02_035300087	SE_02_0353	CD9
	chr12	6262038	6346377	SE_02_035300011	SE_02_0353	PLEKHG6
	chr12	6361102	6378930	SE_02_035300195	SE_02_0353	SCNN1A
	chr12	64664750	64675050	SE_02_035300689	SE_02_0353	MIR548Z
	chr12	6531545	6558235	SE_02_035300307	SE_02_0353	GAPDH
	chr12	6924406	6946493	SE_02_035300804	SE_02_0353	ATN1
	chr12	69328709	69358150	SE_02_035300441	SE_02_0353	LYZ
	chr12	6960531	6966229	SE_02_035300669	SE_02_0353	MIR200C
	chr12	69819230	69853312	SE_02_035300354	SE_02_0353	RAB3IP
	chr12	75932162	75961524	SE_02_035300832	SE_02_0353	PHLDA1
	chr12	75975067	75991073	SE_02_035300785	SE_02_0353	PHLDA1
	chr12	89345717	89391826	SE_02_035300376	SE_02_0353	DUSP6
	chr13	106084039	106105742	SE_02_035300550	SE_02_0353	LOC728192
	chr13	110503264	110532822	SE_02_035300086	SE_02_0353	RAB20
	chr13	110546275	110577927	SE_02_035300337	SE_02_0353	RAB20
	chr13	110711126	110718000	SE_02_035300589	SE_02_0353	ING1
	chr13	110906214	110915123	SE_02_035300678	SE_02_0353	ANKRD10
	chr13	112978521	113015057	SE_02_035300111	SE_02_0353	MCF2L
	chr13	114099978	114132576	SE_02_035300717	SE_02_0353	RASA3
	chr13	20117797	20129039	SE_02_035300726	SE_02_0353	GJA3
	chr13	21031949	21041085	SE_02_035300777	SE_02_0353	LATS2
	chr13	21811191	21839529	SE_02_035300440	SE_02_0353	FGF9
	chr13	24147105	24163168	SE_02_035300563	SE_02_0353	SPATA13
	chr13	24502351	24513509	SE_02_035300707	SE_02_0353	PARP4
	chr13	26950256	26984163	SE_02_035300540	SE_02_0353	USP12
	chr13	27424670	27428118	SE_02_035300657	SE_02_0353	GTF3A
	chr13	27618652	27623456	SE_02_035300635	SE_02_0353	LNX2
	chr13	30828964	30836185	SE_02_035300603	SE_02_0353	C13orf33
	chr13	31926245	32057859	SE_02_035300065	SE_02_0353	FRY
	chr13	34144633	34168326	SE_02_035300674	SE_02_0353	RFC3
	chr13	41058538	41063082	SE_02_035300833	SE_02_0353	WBP4
	chr13	42025432	42050012	SE_02_035300313	SE_02_0353	DGKH
	chr13	73039135	73107738	SE_02_035300075	SE_02_0353	KLF5
	chr13	73161347	73174649	SE_02_035300348	SE_02_0353	KLF5
	chr13	73324074	73337879	SE_02_035300841	SE_02_0353	KLF5
	chr13	73354896	73373915	SE_02_035300808	SE_02_0353	KLF5
	chr13	73397119	73431421	SE_02_035300829	SE_02_0353	KLF5
	chr13	73449293	73468205	SE_02_035300786	SE_02_0353	KLF5
	chr13	97164675	97275597	SE_02_035300031	SE_02_0353	MBNL2
	chr13	98475461	98492763	SE_02_035300557	SE_02_0353	STK24
	chr13	98647150	98666418	SE_02_035300817	SE_02_0353	STK24
	chr13	99191288	99202071	SE_02_035300585	SE_02_0353	UBAC2
	chr14	100130152	100166004	SE_02_035300265	SE_02_0353	DEGS2
	chr14	104664412	104697975	SE_02_035300078	SE_02_0353	INF2
	chr14	105465220	105474565	SE_02_035300581	SE_02_0353	CRIP2
	chr14	105479409	105490693	SE_02_035300317	SE_02_0353	CRIP1
	chr14	22974647	22983460	SE_02_035300858	SE_02_0353	JUB
	chr14	37545634	37600307	SE_02_035300351	SE_02_0353	FOXA1
	chr14	49945597	50068922	SE_02_035300055	SE_02_0353	C14orf182
	chr14	53938276	53964569	SE_02_035300572	SE_02_0353	BMP4
	chr14	55097141	55132369	SE_02_035300484	SE_02_0353	LGALS3
	chr14	64702590	64737490	SE_02_035300732	SE_02_0353	PLEKHG3
	chr14	68779653	68819934	SE_02_035300402	SE_02_0353	C14orf181
	chr14	73728294	73803307	SE_02_035300081	SE_02_0353	C14orf43
	chr14	75223636	75296388	SE_02_035300067	SE_02_0353	FOS
	chr14	90501735	90534243	SE_02_035300381	SE_02_0353	LOC400238
	chr14	91366060	91417873	SE_02_035300423	SE_02_0353	CCDC88C
	chr14	93006762	93056712	SE_02_035300419	SE_02_0353	ITPK1-AS1
	chr14	95248220	95275888	SE_02_035300456	SE_02_0353	CLMN
	chr15	100711438	100724128	SE_02_035300343	SE_02_0353	ASB7
	chr15	29669824	29688378	SE_02_035300728	SE_02_0353	FAM189A1
	chr15	31080666	31093418	SE_02_035300813	SE_02_0353	TRPM1
	chr15	40068689	40125297	SE_02_035300575	SE_02_0353	BMF
	chr15	40337998	40351924	SE_02_035300653	SE_02_0353	C15orf52
	chr15	40762666	40797326	SE_02_035300116	SE_02_0353	C15orf62
	chr15	40842810	40874625	SE_02_035300220	SE_02_0353	SPINT1
	chr15	41917243	41973809	SE_02_035300694	SE_02_0353	EHD4
	chr15	59247467	59314839	SE_02_035300207	SE_02_0353	LDHAL6B
	chr15	59530806	59571904	SE_02_035300121	SE_02_0353	GCNT3
	chr15	59585974	59630103	SE_02_035300080	SE_02_0353	GCNT3
	chr15	60369580	60425032	SE_02_035300054	SE_02_0353	ANXA2
	chr15	63047715	63055759	SE_02_035300686	SE_02_0353	TPM1
	chr15	63347782	63390590	SE_02_035300412	SE_02_0353	CA12
	chr15	63492063	63518281	SE_02_035300372	SE_02_0353	USP3
	chr15	65868866	65886428	SE_02_035300628	SE_02_0353	RAB11A
	chr15	66749278	66781156	SE_02_035300051	SE_02_0353	SMAD6
	chr15	67023662	67152711	SE_02_035300009	SE_02_0353	SMAD3
	chr15	69303630	69337705	SE_02_035300297	SE_02_0353	PAQR5
	chr15	69575581	69604507	SE_02_035300347	SE_02_0353	LOC145837
	chr15	70491644	70529185	SE_02_035300564	SE_02_0353	UACA
	chr15	71070838	71094562	SE_02_035300750	SE_02_0353	CT62
	chr15	74195016	74245780	SE_02_035300142	SE_02_0353	STRA6
	chr15	75156903	75205014	SE_02_035300304	SE_02_0353	C15orf39
	chr15	75694301	75738805	SE_02_035300834	SE_02_0353	CSPG4
	chr15	84724139	84754587	SE_02_035300596	SE_02_0353	ZNF592
	chr15	84838650	84861255	SE_02_035300176	SE_02_0353	ALPK3
	chr15	85577728	85590726	SE_02_035300334	SE_02_0353	AKAP13
	chr15	88614137	88649383	SE_02_035300336	SE_02_0353	ISG20
	chr15	89087370	89130559	SE_02_035300049	SE_02_0353	ABHD2
	chr15	89997737	90006959	SE_02_035300534	SE_02_0353	ZNF710
	chr15	90028128	90076338	SE_02_035300058	SE_02_0353	IDH2
	chr15	90143305	90168718	SE_02_035300602	SE_02_0353	SEMA4B
	chr15	90186989	90234121	SE_02_035300070	SE_02_0353	SEMA4B
	chr15	92803051	92845734	SE_02_035300225	SE_02_0353	ASB9P1
	chr15	92899678	92923185	SE_02_035300600	SE_02_0353	MIR3175
	chr15	96325281	96341689	SE_02_035300554	SE_02_0353	NR2F2
	chr16	19382831	19398425	SE_02_035300794	SE_02_0353	TMC5
	chr16	19412852	19437645	SE_02_035300637	SE_02_0353	TMC5
	chr16	2031975	2037791	SE_02_035300783	SE_02_0353	SLC9A3R2
	chr16	2037810	2045355	SE_02_035300762	SE_02_0353	NTHL1
	chr16	21501017	21522610	SE_02_035300172	SE_02_0353	SLC7A5P2
	chr16	2155973	2164275	SE_02_035300765	SE_02_0353	TRAF7
	chr16	2603384	2633142	SE_02_035300844	SE_02_0353	LOC652276
	chr16	27313142	27328080	SE_02_035300848	SE_02_0353	IL4R
	chr16	2835038	2868768	SE_02_035300436	SE_02_0353	PRSS22
	chr16	29594283	29615865	SE_02_035300295	SE_02_0353	SLC7A5P1
	chr16	3019644	3024633	SE_02_035300857	SE_02_0353	TNFRSF12A
	chr16	31127562	31142412	SE_02_035300567	SE_02_0353	PRSS8
	chr16	323618	335813	SE_02_035300475	SE_02_0353	AXIN1
	chr16	4288145	4329504	SE_02_035300595	SE_02_0353	GLIS2
	chr16	57606173	57636209	SE_02_035300463	SE_02_0353	GPR56
	chr16	66506970	66522889	SE_02_035300510	SE_02_0353	TK2
	chr16	67390636	67406518	SE_02_035300768	SE_02_0353	TPPP3
	chr16	67458	85401	SE_02_035300352	SE_02_0353	MPG
	chr16	68233164	68238484	SE_02_035300784	SE_02_0353	ESRP2
	chr16	68474641	68499656	SE_02_035300634	SE_02_0353	SMPD3
	chr16	68721405	68761647	SE_02_035300329	SE_02_0353	CDH1
	chr16	70739959	70760974	SE_02_035300390	SE_02_0353	LOC100130894
	chr16	71333263	71361142	SE_02_035300312	SE_02_0353	CALB2
	chr16	74729023	74745278	SE_02_035300714	SE_02_0353	MLKL
	chr16	75233710	75268696	SE_02_035300308	SE_02_0353	BCAR1
	chr16	81445122	81460353	SE_02_035300528	SE_02_0353	CMIP
	chr16	85610690	85622822	SE_02_035300663	SE_02_0353	KIAA0182
	chr16	87834008	87872768	SE_02_035300301	SE_02_0353	SLC7A5
	chr16	89287721	89364275	SE_02_035300267	SE_02_0353	ZNF778
	chr16	89828606	89854322	SE_02_035300795	SE_02_0353	SPIRE2
	chr17	1066887	1116275	SE_02_035300497	SE_02_0353	ABR
	chr17	15638442	15660290	SE_02_035300196	SE_02_0353	CDRT1
	chr17	17008270	17057730	SE_02_035300162	SE_02_0353	MPRIP
	chr17	17675629	17753610	SE_02_035300038	SE_02_0353	RAI1
	chr17	17811422	17849659	SE_02_035300399	SE_02_0353	SREBF1
	chr17	18716990	18724995	SE_02_035300503	SE_02_0353	TRIM16L
	chr17	21284629	21296865	SE_02_035300640	SE_02_0353	MAP2K3
	chr17	2385524	2407954	SE_02_035300358	SE_02_0353	MNT
	chr17	28718903	28730811	SE_02_035300410	SE_02_0353	SNORD4B
	chr17	28740408	28750185	SE_02_035300532	SE_02_0353	TRAF4
	chr17	29175868	29180235	SE_02_035300845	SE_02_0353	MYO18A
	chr17	37701462	37747406	SE_02_035300008	SE_02_0353	HNF1B
	chr17	38275580	38288003	SE_02_035300706	SE_02_0353	MRPL45
	chr17	38414378	38484828	SE_02_035300004	SE_02_0353	ARHGAP23
	chr17	38746248	38753698	SE_02_035300562	SE_02_0353	PCGF2
	chr17	39651665	39680410	SE_02_035300853	SE_02_0353	TCAP
	chr17	39735659	39755350	SE_02_035300621	SE_02_0353	GRB7
	chr17	40064902	40076448	SE_02_035300447	SE_02_0353	THRA
	chr17	40097335	40114750	SE_02_035300245	SE_02_0353	NR1D1
	chr17	40308660	40347084	SE_02_035300140	SE_02_0353	RARA
	chr17	40515784	40560460	SE_02_035300340	SE_02_0353	CCR7
	chr17	40883172	40923477	SE_02_035300384	SE_02_0353	KRT20
	chr17	41526165	41531551	SE_02_035300776	SE_02_0353	KRT19
	chr17	41634983	41691254	SE_02_035300052	SE_02_0353	KRT42P
	chr17	41770515	41802119	SE_02_035300104	SE_02_0353	JUP
	chr17	42658747	42680228	SE_02_035300700	SE_02_0353	PLEKHH3
	chr17	43168638	43177328	SE_02_035300739	SE_02_0353	NBR1
	chr17	43526836	43557263	SE_02_035300435	SE_02_0353	ETV4
	chr17	4475174	4543722	SE_02_035300147	SE_02_0353	SPNS2
	chr17	45126535	45133527	SE_02_035300693	SE_02_0353	PLCD3
	chr17	47501159	47513537	SE_02_035300810	SE_02_0353	MRPL45P2
	chr17	47947112	47968275	SE_02_035300367	SE_02_0353	PRR15L
	chr17	48471619	48506483	SE_02_035300703	SE_02_0353	HOXB1
	chr17	48554666	48578051	SE_02_035300171	SE_02_0353	HOXB3
	chr17	48578125	48608275	SE_02_035300044	SE_02_0353	HOXB5
	chr17	48608337	48648167	SE_02_035300018	SE_02_0353	HOXB9
	chr17	50026439	50065956	SE_02_035300178	SE_02_0353	ITGA3
	chr17	50627457	50641683	SE_02_035300341	SE_02_0353	ABCC3
	chr17	50656928	50697771	SE_02_035300285	SE_02_0353	ANKRD40
	chr17	50882780	50954949	SE_02_035300056	SE_02_0353	TOB1
	chr17	57860220	57956358	SE_02_035300003	SE_02_0353	CUEDC1
	chr17	58368999	58417716	SE_02_035300255	SE_02_0353	RNF43
	chr17	59825502	59859452	SE_02_035300059	SE_02_0353	MIR21
	chr17	64765143	64816721	SE_02_035300574	SE_02_0353	LOC146880
	chr17	65359892	65376192	SE_02_035300672	SE_02_0353	AXIN2
	chr17	67359976	67391710	SE_02_035300335	SE_02_0353	PITPNC1
	chr17	72385642	72489910	SE_02_035300036	SE_02_0353	LOC100499467
	chr17	72560351	72635759	SE_02_035300224	SE_02_0353	LOC100499467
	chr17	73286791	73313210	SE_02_035300243	SE_02_0353	CDC42EP4
	chr17	74394559	74455203	SE_02_035300275	SE_02_0353	GPRC5C
	chr17	74744744	74770835	SE_02_035300516	SE_02_0353	SLC9A3R1
	chr17	75076688	75126413	SE_02_035300057	SE_02_0353	ARMC7
	chr17	75632999	75648487	SE_02_035300252	SE_02_0353	LOC643008
	chr17	75674726	75708228	SE_02_035300268	SE_02_0353	SAP30BP
	chr17	75821819	75878145	SE_02_035300084	SE_02_0353	UNC13D
	chr17	77279240	77289834	SE_02_035300108	SE_02_0353	SEPT9
	chr17	77304601	77343051	SE_02_035300486	SE_02_0353	SEPT9
	chr17	77355985	77395585	SE_02_035300645	SE_02_0353	SEPT9
	chr17	7833789	7852456	SE_02_035300389	SE_02_0353	KDM6B
	chr17	78958216	79009786	SE_02_035300280	SE_02_0353	LGALS3BP
	chr17	79986076	79995126	SE_02_035300599	SE_02_0353	TBC1D16
	chr17	81017594	81098753	SE_02_035300047	SE_02_0353	BAIAP2
	chr17	81129121	81136926	SE_02_035300461	SE_02_0353	MIR1250
	chr17	81327954	81350601	SE_02_035300098	SE_02_0353	TMEM105
	chr17	81510268	81520446	SE_02_035300695	SE_02_0353	ACTG1
	chr17	81710076	81737038	SE_02_035300854	SE_02_0353	SLC25A10
	chr17	81855035	81872781	SE_02_035300424	SE_02_0353	P4HB
	chr17	82205203	82247893	SE_02_035300542	SE_02_0353	SLC16A3
	chr17	82267057	82299172	SE_02_035300594	SE_02_0353	CSNK1D
	chr17	82835661	82891639	SE_02_035300120	SE_02_0353	ZNF750
	chr17	83047882	83110655	SE_02_035300169	SE_02_0353	METRNL
	chr18	22167050	22195892	SE_02_035300400	SE_02_0353	GATA6
	chr18	3036918	3054702	SE_02_035300591	SE_02_0353	LPIN2
	chr18	3245536	3264335	SE_02_035300380	SE_02_0353	MYL12B
	chr18	3446018	3459872	SE_02_035300124	SE_02_0353	TGIF1
	chr18	3592082	3628279	SE_02_035300023	SE_02_0353	FLJ35776
	chr18	3651204	3673489	SE_02_035300517	SE_02_0353	FLJ35776
	chr18	3691108	3727177	SE_02_035300740	SE_02_0353	FLJ35776
	chr18	48133035	48169312	SE_02_035300630	SE_02_0353	ZBTB7C
	chr18	48921942	48961898	SE_02_035300271	SE_02_0353	SMAD7
	chr18	49715564	49732443	SE_02_035300742	SE_02_0353	ACAA2
	chr18	58176964	58225896	SE_02_035300825	SE_02_0353	NEDD4L
	chr18	70372459	70386269	SE_02_035300847	SE_02_0353	SOCS6
	chr19	10724425	10770790	SE_02_035300089	SE_02_0353	MIR638
	chr19	11085135	11096924	SE_02_035300642	SE_02_0353	LDLR
	chr19	12777152	12796814	SE_02_035300240	SE_02_0353	JUNB
	chr19	13140795	13173127	SE_02_035300183	SE_02_0353	IER2
	chr19	13833796	13845643	SE_02_035300512	SE_02_0353	MIR23A
	chr19	14496281	14521027	SE_02_035300633	SE_02_0353	DNAJB1
	chr19	16066337	16098690	SE_02_035300418	SE_02_0353	TPM4
	chr19	1854891	1876742	SE_02_035300648	SE_02_0353	KLF16
	chr19	2031494	2067778	SE_02_035300310	SE_02_0353	MKNK2
	chr19	33023803	33064912	SE_02_035300109	SE_02_0353	RHPN2
	chr19	33273499	33294791	SE_02_035300398	SE_02_0353	CEBPA
	chr19	38262719	38268910	SE_02_035300610	SE_02_0353	SPINT2
	chr19	38296930	38306576	SE_02_035300133	SE_02_0353	C19orf33
	chr19	38629125	38737809	SE_02_035300001	SE_02_0353	ACTN4
	chr19	38790075	38821274	SE_02_035300507	SE_02_0353	LGALS4
	chr19	38847536	38887697	SE_02_035300143	SE_02_0353	RINL
	chr19	39133279	39168413	SE_02_035300859	SE_02_0353	PAK4
	chr19	39396970	39414477	SE_02_035300041	SE_02_0353	ZFP36
	chr19	39427728	39436887	SE_02_035300537	SE_02_0353	RPS16
	chr19	40416941	40446494	SE_02_035300314	SE_02_0353	SERTAD1
	chr19	4042774	4105179	SE_02_035300256	SE_02_0353	ZBTB7A
	chr19	40602952	40612322	SE_02_035300433	SE_02_0353	LTBP4
	chr19	40713848	40720336	SE_02_035300201	SE_02_0353	ITPKC
	chr19	41158149	41177597	SE_02_035300623	SE_02_0353	CYP2S1
	chr19	41732243	41750907	SE_02_035300769	SE_02_0353	CEACAM6
	chr19	42190925	42209775	SE_02_035300831	SE_02_0353	DEDD2
	chr19	42249903	42256381	SE_02_035300582	SE_02_0353	ERF
	chr19	43667523	43704652	SE_02_035300431	SE_02_0353	PLAUR
	chr19	43737499	43741926	SE_02_035300782	SE_02_0353	C19orf61
	chr19	44585922	44640994	SE_02_035300471	SE_02_0353	PVR
	chr19	44717733	44755536	SE_02_035300216	SE_02_0353	BCL3
	chr19	44844322	44849801	SE_02_035300688	SE_02_0353	PVRL2
	chr19	45401802	45407761	SE_02_035300801	SE_02_0353	PPP1R13L
	chr19	45439387	45486004	SE_02_035300048	SE_02_0353	FOSB
	chr19	45504912	45529748	SE_02_035300239	SE_02_0353	VASP
	chr19	46713221	46734311	SE_02_035300691	SE_02_0353	PRKD2
	chr19	46764277	46816488	SE_02_035300200	SE_02_0353	SLC1A5
	chr19	47093773	47125559	SE_02_035300063	SE_02_0353	ZC3H4
	chr19	47185450	47191998	SE_02_035300670	SE_02_0353	MIR3190
	chr19	47633112	47675168	SE_02_035300289	SE_02_0353	GLTSCR1
	chr19	47775135	47780744	SE_02_035300644	SE_02_0353	SEPW1
	chr19	48550980	48560437	SE_02_035300846	SE_02_0353	SULT2B1
	chr19	48623238	48631493	SE_02_035300730	SE_02_0353	SPHK2
	chr19	48871497	48876433	SE_02_035300445	SE_02_0353	PPP1R15A
	chr19	49637390	49643306	SE_02_035300677	SE_02_0353	RRAS
	chr19	49875245	49879393	SE_02_035300665	SE_02_0353	AKT1S1
	chr19	50165534	50216752	SE_02_035300050	SE_02_0353	MYH14
	chr19	50329467	50335986	SE_02_035300592	SE_02_0353	KCNC3
	chr19	50966034	50977058	SE_02_035300745	SE_02_0353	KLK6
	chr19	51338453	51368742	SE_02_035300126	SE_02_0353	ETFB
	chr19	52922250	52947459	SE_02_035300212	SE_02_0353	ZNF321
	chr19	53863591	53890054	SE_02_035300260	SE_02_0353	PRKCG
	chr19	54461360	54472166	SE_02_035300646	SE_02_0353	LENG9
	chr19	55068724	55088813	SE_02_035300152	SE_02_0353	EPS8L1
	chr19	55206138	55217742	SE_02_035300333	SE_02_0353	PTPRH
	chr19	55320812	55342018	SE_02_035300382	SE_02_0353	TMEM150B
	chr19	55467438	55478329	SE_02_035300154	SE_02_0353	ZNF628
	chr19	57796508	57830137	SE_02_035300365	SE_02_0353	ZNF552
	chr2	10270653	10302777	SE_02_035300756	SE_02_0353	HPCAL1
	chr2	109674278	109704527	SE_02_035300559	SE_02_0353	ANKRD57
	chr2	109985902	110001606	SE_02_035300666	SE_02_0353	LOC100288570
	chr2	110050606	110072227	SE_02_035300393	SE_02_0353	MIR4267
	chr2	110097071	110117093	SE_02_035300146	SE_02_0353	MALL
	chr2	110299126	110320859	SE_02_035300395	SE_02_0353	LOC100507334
	chr2	110369785	110385598	SE_02_035300660	SE_02_0353	LOC151009
	chr2	111489774	111496613	SE_02_035300721	SE_02_0353	LOC541471
	chr2	113198322	113242310	SE_02_035300263	SE_02_0353	LOC654433
	chr2	11341417	11390639	SE_02_035300273	SE_02_0353	ROCK2
	chr2	121688841	121711453	SE_02_035300519	SE_02_0353	MKI67IP
	chr2	127063630	127116587	SE_02_035300543	SE_02_0353	BIN1
	chr2	127386782	127416609	SE_02_035300584	SE_02_0353	PROC
	chr2	1486798	1496794	SE_02_035300560	SE_02_0353	TPO
	chr2	150470547	150487705	SE_02_035300413	SE_02_0353	RND3
	chr2	156319325	156343799	SE_02_035300368	SE_02_0353	NR4A2
	chr2	1577777	1601867	SE_02_035300601	SE_02_0353	PXDN
	chr2	160204502	160242676	SE_02_035300446	SE_02_0353	ITGB6
	chr2	168158103	168221762	SE_02_035300165	SE_02_0353	STK39
	chr2	172427616	172466033	SE_02_035300148	SE_02_0353	ITGA6
	chr2	177238988	177267294	SE_02_035300579	SE_02_0353	MIR3128
	chr2	20106899	20149818	SE_02_035300429	SE_02_0353	LAPTM4A
	chr2	201254464	201261253	SE_02_035300850	SE_02_0353	CASP8
	chr2	20178398	20233921	SE_02_035300150	SE_02_0353	SDC1
	chr2	20576873	20635927	SE_02_035300254	SE_02_0353	HS1BP3
	chr2	218270451	218313490	SE_02_035300053	SE_02_0353	TMBIM1
	chr2	218386896	218407815	SE_02_035300604	SE_02_0353	CTDSP1
	chr2	226790774	226802116	SE_02_035300775	SE_02_0353	IRS1
	chr2	231602979	231615676	SE_02_035300511	SE_02_0353	C2orf57
	chr2	231642324	231687910	SE_02_035300181	SE_02_0353	PTMA
	chr2	231705661	231715404	SE_02_035300676	SE_02_0353	PTMA
	chr2	234969752	235010779	SE_02_035300383	SE_02_0353	SH3BP4
	chr2	235494168	235515653	SE_02_035300840	SE_02_0353	AGAP1
	chr2	237474633	237513564	SE_02_035300411	SE_02_0353	MLPH
	chr2	238284349	238301273	SE_02_035300452	SE_02_0353	PER2
	chr2	240559290	240581328	SE_02_035300425	SE_02_0353	RNPEPL1
	chr2	28358777	28413620	SE_02_035300309	SE_02_0353	FOSL2
	chr2	28610320	28663577	SE_02_035300479	SE_02_0353	PPP1CB
	chr2	29108144	29131061	SE_02_035300827	SE_02_0353	CLIP4
	chr2	38075304	38120861	SE_02_035300235	SE_02_0353	CYP1B1
	chr2	42975048	43052515	SE_02_035300293	SE_02_0353	ZFP36L2
	chr2	43156911	43229486	SE_02_035300028	SE_02_0353	ZFP36L2
	chr2	45921538	45965357	SE_02_035300344	SE_02_0353	PRKCE
	chr2	47014198	47045659	SE_02_035300149	SE_02_0353	MCFD2
	chr2	47064309	47090012	SE_02_035300136	SE_02_0353	C2orf61
	chr2	47339481	47372269	SE_02_035300611	SE_02_0353	EPCAM
	chr2	54523527	54590990	SE_02_035300281	SE_02_0353	SPTBN1
	chr2	64200030	64228828	SE_02_035300744	SE_02_0353	LOC150992
	chr2	65377333	65437888	SE_02_035300247	SE_02_0353	SPRED2
	chr2	69740189	69800473	SE_02_035300198	SE_02_0353	ANXA4
	chr2	69933454	69965486	SE_02_035300797	SE_02_0353	ASPRV1
	chr2	70070940	70112728	SE_02_035300515	SE_02_0353	PCBP1
	chr2	73980159	73988252	SE_02_035300774	SE_02_0353	DGUOK
	chr2	84905607	84927296	SE_02_035300638	SE_02_0353	TMSB10
	chr2	84944950	84973666	SE_02_035300818	SE_02_0353	KCMF1
	chr2	85396128	85472775	SE_02_035300125	SE_02_0353	SH2D6
	chr2	8676461	8686337	SE_02_035300820	SE_02_0353	ID2
	chr2	87453913	87460744	SE_02_035300736	SE_02_0353	NCRNA00152
	chr2	9141949	9191714	SE_02_035300145	SE_02_0353	ASAP2
	chr2	9204598	9216227	SE_02_035300790	SE_02_0353	ASAP2
	chr2	9229283	9252585	SE_02_035300493	SE_02_0353	ASAP2
	chr20	1324341	1331457	SE_02_035300855	SE_02_0353	SDCBP2
	chr20	17556117	17572626	SE_02_035300723	SE_02_0353	BFSP1
	chr20	19879364	19892069	SE_02_035300371	SE_02_0353	RIN2
	chr20	25220472	25256254	SE_02_035300097	SE_02_0353	PYGB
	chr20	25294879	25312110	SE_02_035300668	SE_02_0353	PYGB
	chr20	31559376	31613002	SE_02_035300025	SE_02_0353	ID1
	chr20	31661776	31724213	SE_02_035300015	SE_02_0353	BCL2L1
	chr20	32464047	32486646	SE_02_035300242	SE_02_0353	C20orf112
	chr20	33778126	33827506	SE_02_035300197	SE_02_0353	CHMP4B
	chr20	34512147	34533687	SE_02_035300619	SE_02_0353	DYNLRB1
	chr20	35261304	35280452	SE_02_035300684	SE_02_0353	EIF6
	chr20	360491	383267	SE_02_035300219	SE_02_0353	TRIB3
	chr20	36079710	36102068	SE_02_035300477	SE_02_0353	EPB41L1
	chr20	37342395	37359792	SE_02_035300796	SE_02_0353	SRC
	chr20	37522574	37542991	SE_02_035300443	SE_02_0353	BLCAP
	chr20	3795289	3819185	SE_02_035300407	SE_02_0353	CDC25B
	chr20	38109398	38174145	SE_02_035300291	SE_02_0353	TGM2
	chr20	400202	421796	SE_02_035300474	SE_02_0353	RBCK1
	chr20	45336382	45349072	SE_02_035300406	SE_02_0353	SDC4
	chr20	47302548	47335478	SE_02_035300034	SE_02_0353	LOC100131496
	chr20	47351648	47362322	SE_02_035300066	SE_02_0353	ZMYND8
	chr20	47791635	47822075	SE_02_035300626	SE_02_0353	SULF2
	chr20	49673380	49718479	SE_02_035300323	SE_02_0353	B4GALT5
	chr20	49764998	49824366	SE_02_035300188	SE_02_0353	SLC9A8
	chr20	49914036	49928746	SE_02_035300733	SE_02_0353	SPATA2
	chr20	50103281	50173296	SE_02_035300153	SE_02_0353	TMEM189
	chr20	50215741	50335390	SE_02_035300030	SE_02_0353	LOC284751
	chr20	50414652	50447554	SE_02_035300649	SE_02_0353	PTPN1
	chr20	50724008	50768487	SE_02_035300073	SE_02_0353	PARD6B
	chr20	51735442	51768411	SE_02_035300112	SE_02_0353	ATP9A
	chr20	53578549	53624958	SE_02_035300277	SE_02_0353	ZNF217
	chr20	53735334	53791626	SE_02_035300338	SE_02_0353	SUMO1P1
	chr20	53828702	53872599	SE_02_035300555	SE_02_0353	SUMO1P1
	chr20	54066361	54072107	SE_02_035300573	SE_02_0353	BCAS1
	chr20	54106673	54135031	SE_02_035300565	SE_02_0353	BCAS1
	chr20	57432018	57451056	SE_02_035300292	SE_02_0353	RBM38
	chr20	57675247	57719186	SE_02_035300110	SE_02_0353	PMEPA1
	chr20	58995301	59017924	SE_02_035300494	SE_02_0353	CTSZ
	chr20	62349741	62377205	SE_02_035300072	SE_02_0353	LAMA5
	chr20	62641507	62669341	SE_02_035300553	SE_02_0353	LOC100127888
	chr20	62703117	62798950	SE_02_035300019	SE_02_0353	NTSR1
	chr20	63519438	63546976	SE_02_035300141	SE_02_0353	PTK6
	chr20	63853455	63866471	SE_02_035300826	SE_02_0353	C20orf135
	chr21	38784618	38853947	SE_02_035300416	SE_02_0353	ETS2
	chr21	38897909	38926541	SE_02_035300533	SE_02_0353	ETS2
	chr21	38948613	38979695	SE_02_035300605	SE_02_0353	ETS2
	chr21	38995032	39049066	SE_02_035300491	SE_02_0353	PSMG1
	chr21	41663565	41685591	SE_02_035300729	SE_02_0353	NCRNA00111
	chr21	41702847	41730696	SE_02_035300346	SE_02_0353	NCRNA00112
	chr21	42449631	42476170	SE_02_035300330	SE_02_0353	RSPH1
	chr21	42508427	42536292	SE_02_035300420	SE_02_0353	SLC37A1
	chr21	43330978	43345694	SE_02_035300509	SE_02_0353	SIK1
	chr21	43382776	43465749	SE_02_035300257	SE_02_0353	SIK1
	chr21	43710743	43741089	SE_02_035300332	SE_02_0353	PDXK
	chr22	19843903	19856595	SE_02_035300246	SE_02_0353	C22orf29
	chr22	19940596	19987187	SE_02_035300076	SE_02_0353	COMT
	chr22	20200421	20212755	SE_02_035300408	SE_02_0353	LOC150197
	chr22	20503764	20512583	SE_02_035300821	SE_02_0353	MED15
	chr22	20936558	20959433	SE_02_035300449	SE_02_0353	AIFM3
	chr22	23517483	23539921	SE_02_035300506	SE_02_0353	IGLL1
	chr22	29003442	29041386	SE_02_035300279	SE_02_0353	C22orf31
	chr22	30194894	30215468	SE_02_035300570	SE_02_0353	LIF
	chr22	30234818	30258641	SE_02_035300667	SE_02_0353	LIF
	chr22	36328236	36346094	SE_02_035300735	SE_02_0353	MYH9
	chr22	36360719	36436746	SE_02_035300238	SE_02_0353	MYH9
	chr22	36451039	36470530	SE_02_035300641	SE_02_0353	TXN2
	chr22	37491831	37526920	SE_02_035300464	SE_02_0353	CARD10
	chr22	37545179	37582781	SE_02_035300807	SE_02_0353	CDC42EP1
	chr22	38217548	38244170	SE_02_035300377	SE_02_0353	MAFF
	chr22	38693245	38719359	SE_02_035300838	SE_02_0353	GTPBP1
	chr22	40383427	40411615	SE_02_035300828	SE_02_0353	SGSM3
	chr22	42270754	42321848	SE_02_035300502	SE_02_0353	LOC388906
	chr22	42922303	43008128	SE_02_035300300	SE_02_0353	PACSIN2
	chr22	46062115	46071058	SE_02_035300727	SE_02_0353	C22orf26
	chr22	46072035	46095275	SE_02_035300105	SE_02_0353	LOC400931
	chr22	46096185	46111516	SE_02_035300451	SE_02_0353	MIRLET7A3
	chr22	49931193	49971129	SE_02_035300361	SE_02_0353	PIM3
	chr22	50272035	50314629	SE_02_035300209	SE_02_0353	PLXNB2
	chr3	102156306	102198137	SE_02_035300158	SE_02_0353	LOC152225
	chr3	12442358	12481922	SE_02_035300369	SE_02_0353	TSEN2
	chr3	127814968	127823189	SE_02_035300590	SE_02_0353	MGLL
	chr3	128317052	128386185	SE_02_035300690	SE_02_0353	MIR1280
	chr3	128402882	128436592	SE_02_035300757	SE_02_0353	DNAJB8
	chr3	134347980	134383337	SE_02_035300454	SE_02_0353	AMOTL2
	chr3	14401758	14458198	SE_02_035300779	SE_02_0353	SLC6A6
	chr3	149339087	149415786	SE_02_035300035	SE_02_0353	TM4SF1
	chr3	149466000	149480624	SE_02_035300230	SE_02_0353	TM4SF4
	chr3	156810414	156828620	SE_02_035300215	SE_02_0353	LEKR1
	chr3	157080907	157090815	SE_02_035300675	SE_02_0353	LOC100498859
	chr3	157119100	157137595	SE_02_035300269	SE_02_0353	LOC339894
	chr3	157158178	157176522	SE_02_035300836	SE_02_0353	CCNL1
	chr3	172127000	172157173	SE_02_035300531	SE_02_0353	FNDC3B
	chr3	177335492	177361318	SE_02_035300724	SE_02_0353	TBL1XR1
	chr3	185527188	185562003	SE_02_035300394	SE_02_0353	LIPH
	chr3	193826513	193903526	SE_02_035300199	SE_02_0353	LOC100128023
	chr3	194023641	194167436	SE_02_035300024	SE_02_0353	HES1
	chr3	195863231	195879383	SE_02_035300356	SE_02_0353	TNK2
	chr3	197501537	197523219	SE_02_035300311	SE_02_0353	BDH1
	chr3	42122958	42165429	SE_02_035300561	SE_02_0353	TRAK1
	chr3	42472409	42508353	SE_02_035300379	SE_02_0353	VIPR1
	chr3	50226855	50273063	SE_02_035300319	SE_02_0353	GNAI2
	chr3	57949848	57984703	SE_02_035300490	SE_02_0353	FLNB
	chr3	57997325	58022284	SE_02_035300759	SE_02_0353	FLNB
	chr3	69198664	69250304	SE_02_035300792	SE_02_0353	LMOD3
	chr3	71007042	71067462	SE_02_035300522	SE_02_0353	MIR1284
	chr3	71116691	71154822	SE_02_035300470	SE_02_0353	MIR1284
	chr4	123544703	123557139	SE_02_035300652	SE_02_0353	LOC285419
	chr4	1326642	1352068	SE_02_035300442	SE_02_0353	KIAA1530
	chr4	140129858	140155056	SE_02_035300577	SE_02_0353	MAML3
	chr4	24582437	24605693	SE_02_035300662	SE_02_0353	DHX15
	chr4	2793088	2810053	SE_02_035300159	SE_02_0353	SH3BP2
	chr4	2921771	2938355	SE_02_035300606	SE_02_0353	MFSD10
	chr4	37429879	37490718	SE_02_035300299	SE_02_0353	C4orf19
	chr4	38119508	38181360	SE_02_035300476	SE_02_0353	PTTG2
	chr4	38654308	38676147	SE_02_035300321	SE_02_0353	FLJ13197
	chr4	6687629	6698605	SE_02_035300175	SE_02_0353	S100P
	chr4	74652505	74683576	SE_02_035300438	SE_02_0353	BTC
	chr4	76663390	76706296	SE_02_035300518	SE_02_0353	ANKRD56
	chr4	78531982	78570113	SE_02_035300210	SE_02_0353	ANXA3
	chr5	10701661	10748633	SE_02_035300430	SE_02_0353	DAP
	chr5	107454853	107479694	SE_02_035300520	SE_02_0353	EFNA5
	chr5	1093385	1162977	SE_02_035300132	SE_02_0353	SLC12A7
	chr5	127908883	127962969	SE_02_035300385	SE_02_0353	FLJ33630
	chr5	1314147	1331961	SE_02_035300100	SE_02_0353	CLPTM1L
	chr5	132495017	132514220	SE_02_035300587	SE_02_0353	IRF1
	chr5	134002911	134021223	SE_02_035300851	SE_02_0353	VDAC1
	chr5	134502774	134528250	SE_02_035300170	SE_02_0353	PHF15
	chr5	139635723	139711347	SE_02_035300144	SE_02_0353	CXXC5
	chr5	141841012	141878285	SE_02_035300107	SE_02_0353	PCDH1
	chr5	142320355	142328354	SE_02_035300767	SE_02_0353	SPRY4
	chr5	142816493	142875807	SE_02_035300286	SE_02_0353	ARHGAP26
	chr5	149113349	149163425	SE_02_035300747	SE_02_0353	ABLIM3
	chr5	149438214	149491334	SE_02_035300177	SE_02_0353	MIR145
	chr5	168287864	168366902	SE_02_035300106	SE_02_0353	WWC1
	chr5	170744321	170760256	SE_02_035300217	SE_02_0353	GABRP
	chr5	172730918	172790142	SE_02_035300222	SE_02_0353	DUSP1
	chr5	172834346	172861968	SE_02_035300547	SE_02_0353	ERGIC1
	chr5	181241256	181249070	SE_02_035300809	SE_02_0353	GNB2L1
	chr5	42982073	43020873	SE_02_035300137	SE_02_0353	LOC648987
	chr5	43037279	43043622	SE_02_035300571	SE_02_0353	C5orf39
	chr5	43063300	43069796	SE_02_035300364	SE_02_0353	LOC100132356
	chr5	58068945	58092319	SE_02_035300778	SE_02_0353	PLK2
	chr5	662461	675009	SE_02_035300427	SE_02_0353	TPPP
	chr5	74237202	74259093	SE_02_035300793	SE_02_0353	ENC1
	chr5	74383865	74420067	SE_02_035300799	SE_02_0353	ENC1
	chr5	74566979	74599813	SE_02_035300696	SE_02_0353	ENC1
	chr5	74623880	74644318	SE_02_035300362	SE_02_0353	ENC1
	chr5	929242	961473	SE_02_035300478	SE_02_0353	TRIP13
	chr6	1015469	1089659	SE_02_035300101	SE_02_0353	LOC285768
	chr6	11187107	11233866	SE_02_035300248	SE_02_0353	NEDD9
	chr6	12310929	12350108	SE_02_035300128	SE_02_0353	EDN1
	chr6	128490137	128520684	SE_02_035300227	SE_02_0353	PTPRK
	chr6	1286316	1336653	SE_02_035300466	SE_02_0353	FOXQ1
	chr6	137216810	137248443	SE_02_035300682	SE_02_0353	IFNGR1
	chr6	158798604	158871197	SE_02_035300069	SE_02_0353	EZR
	chr6	16746750	16782355	SE_02_035300468	SE_02_0353	ATXN1
	chr6	26118340	26127418	SE_02_035300715	SE_02_0353	HIST1H2BC
	chr6	26155029	26173731	SE_02_035300752	SE_02_0353	HIST1H2BD
	chr6	27806462	27816509	SE_02_035300580	SE_02_0353	HIST1H3H
	chr6	30086082	30131248	SE_02_035300316	SE_02_0353	TRIM31
	chr6	30882055	30887493	SE_02_035300488	SE_02_0353	DDR1
	chr6	31733770	31748047	SE_02_035300320	SE_02_0353	MSH5
	chr6	31820616	31830146	SE_02_035300366	SE_02_0353	HSPA1B
	chr6	32967225	32972149	SE_02_035300544	SE_02_0353	BRD2
	chr6	33296893	33315953	SE_02_035300556	SE_02_0353	RGL2
	chr6	3355259	3384172	SE_02_035300233	SE_02_0353	SLC22A23
	chr6	35385627	35415876	SE_02_035300428	SE_02_0353	FANCE
	chr6	41712012	41744635	SE_02_035300806	SE_02_0353	TFEB
	chr6	42087361	42143974	SE_02_035300182	SE_02_0353	C6orf132
	chr6	43769500	43775678	SE_02_035300754	SE_02_0353	VEGFA
	chr6	47094034	47162251	SE_02_035300244	SE_02_0353	GPR110
	chr6	73566049	73586892	SE_02_035300697	SE_02_0353	EEF1A1
	chr7	100567459	100586247	SE_02_035300849	SE_02_0353	SAP25
	chr7	100824476	100838026	SE_02_035300650	SE_02_0353	EPHB4
	chr7	104922911	104947296	SE_02_035300264	SE_02_0353	LOC723809
	chr7	104969947	104985467	SE_02_035300683	SE_02_0353	LOC100216545
	chr7	105003000	105016482	SE_02_035300298	SE_02_0353	LOC100216545
	chr7	106058298	106074537	SE_02_035300529	SE_02_0353	SYPL1
	chr7	116669564	116727901	SE_02_035300538	SE_02_0353	MET
	chr7	130883822	130945970	SE_02_035300022	SE_02_0353	LOC646329
	chr7	131106043	131112124	SE_02_035300822	SE_02_0353	FLJ43663
	chr7	131508009	131556639	SE_02_035300250	SE_02_0353	PODXL
	chr7	143278682	143290065	SE_02_035300709	SE_02_0353	TMEM139
	chr7	1453788	1474852	SE_02_035300704	SE_02_0353	MICALL2
	chr7	150365432	150383154	SE_02_035300409	SE_02_0353	REPIN1
	chr7	151057044	151064321	SE_02_035300613	SE_02_0353	SLC4A2
	chr7	1530933	1539504	SE_02_035300305	SE_02_0353	MAFK
	chr7	155803429	155813084	SE_02_035300359	SE_02_0353	SHH
	chr7	155950190	155964473	SE_02_035300214	SE_02_0353	SHH
	chr7	158802128	158829415	SE_02_035300322	SE_02_0353	ESYT2
	chr7	20328748	20355549	SE_02_035300716	SE_02_0353	ITGB8
	chr7	23464907	23475617	SE_02_035300426	SE_02_0353	IGF2BP3
	chr7	2509715	2531807	SE_02_035300270	SE_02_0353	LFNG
	chr7	26152161	26160454	SE_02_035300773	SE_02_0353	NFE2L3
	chr7	26198277	26203468	SE_02_035300843	SE_02_0353	HNRNPA2B1
	chr7	27102255	27126965	SE_02_035300213	SE_02_0353	HOXA3
	chr7	27143886	27154051	SE_02_035300302	SE_02_0353	HOXA6
	chr7	27162925	27194368	SE_02_035300016	SE_02_0353	HOXA10
	chr7	27200311	27209065	SE_02_035300578	SE_02_0353	HOXA13
	chr7	29562398	29567756	SE_02_035300748	SE_02_0353	PRR15
	chr7	30593455	30598889	SE_02_035300698	SE_02_0353	GARS
	chr7	36257837	36293002	SE_02_035300378	SE_02_0353	KIAA0895
	chr7	45967597	45985498	SE_02_035300705	SE_02_0353	IGFBP3
	chr7	4711623	4754068	SE_02_035300643	SE_02_0353	KIAA0415
	chr7	47469674	47500911	SE_02_035300469	SE_02_0353	TNS3
	chr7	47570058	47582706	SE_02_035300500	SE_02_0353	TNS3
	chr7	5416848	5431004	SE_02_035300099	SE_02_0353	TNRC18
	chr7	55064214	55092041	SE_02_035300508	SE_02_0353	EGFR
	chr7	5525949	5534476	SE_02_035300439	SE_02_0353	ACTB
	chr7	73699488	73722291	SE_02_035300231	SE_02_0353	MIR4284
	chr7	73736409	73750244	SE_02_035300179	SE_02_0353	ABHD11
	chr7	73767623	73775449	SE_02_035300608	SE_02_0353	CLDN3
	chr7	73793577	73855511	SE_02_035300029	SE_02_0353	CLDN4
	chr7	74451179	74484542	SE_02_035300117	SE_02_0353	GTF2IRD1
	chr7	76344623	76394292	SE_02_035300187	SE_02_0353	YWHAG
	chr7	801611	834660	SE_02_035300780	SE_02_0353	SUN1
	chr7	897288	958547	SE_02_035300005	SE_02_0353	ADAP1
	chr7	973821	989120	SE_02_035300772	SE_02_0353	CYP2W1
	chr7	98281753	98295786	SE_02_035300325	SE_02_0353	BRI3
	chr7	98348750	98421341	SE_02_035300115	SE_02_0353	BAIAP2L1
	chr7	99207081	99231502	SE_02_035300375	SE_02_0353	KPNA7
	chr7_KI270803v1_alt	466206	513917	SE_02_035300457	SE_02_0353	LOC730441
	chr8	101490659	101506077	SE_02_035300814	SE_02_0353	GRHL2
	chr8	102651433	102658576	SE_02_035300746	SE_02_0353	KLF10
	chr8	102804568	102811527	SE_02_035300764	SE_02_0353	AZIN1
	chr8	109570578	109621094	SE_02_035300680	SE_02_0353	SYBU
	chr8	118078127	118114316	SE_02_035300294	SE_02_0353	EXT1
	chr8	118544454	118549819	SE_02_035300654	SE_02_0353	SAMD12
	chr8	118619357	118623050	SE_02_035300583	SE_02_0353	SAMD12
	chr8	119208398	119211011	SE_02_035300422	SE_02_0353	MAL2
	chr8	120808072	120828940	SE_02_035300253	SE_02_0353	SNTB1
	chr8	122779963	122807910	SE_02_035300632	SE_02_0353	ZHX2
	chr8	123381125	123397464	SE_02_035300699	SE_02_0353	ATAD2
	chr8	123534130	123549187	SE_02_035300499	SE_02_0353	FBXO32
	chr8	124472248	124477182	SE_02_035300287	SE_02_0353	RNF139
	chr8	125213024	125225839	SE_02_035300386	SE_02_0353	NSMCE2
	chr8	125258987	125292800	SE_02_035300208	SE_02_0353	TRIB1
	chr8	125409200	125436097	SE_02_035300020	SE_02_0353	TRIB1
	chr8	125640790	125666260	SE_02_035300027	SE_02_0353	TRIB1
	chr8	125684845	125702462	SE_02_035300860	SE_02_0353	TRIB1
	chr8	126431579	126436716	SE_02_035300403	SE_02_0353	FAM84B
	chr8	126553850	126571723	SE_02_035300138	SE_02_0353	FAM84B
	chr8	127200645	127228141	SE_02_035300010	SE_02_0353	POU5F1B
	chr8	127246077	127278766	SE_02_035300156	SE_02_0353	POU5F1B
	chr8	127292661	127308284	SE_02_035300157	SE_02_0353	POU5F1B
	chr8	127399011	127407513	SE_02_035300558	SE_02_0353	POU5F1B
	chr8	127563135	127591924	SE_02_035300345	SE_02_0353	LOC727677
	chr8	127732537	127740790	SE_02_035300249	SE_02_0353	MYC
	chr8	128174616	128179424	SE_02_035300789	SE_02_0353	MIR1208
	chr8	133567276	133576374	SE_02_035300077	SE_02_0353	ST3GAL1
	chr8	133605607	133610587	SE_02_035300489	SE_02_0353	ST3GAL1
	chr8	140444826	140466205	SE_02_035300262	SE_02_0353	TRAPPC9
	chr8	140509571	140513373	SE_02_035300455	SE_02_0353	CHRAC1
	chr8	140587386	140599538	SE_02_035300639	SE_02_0353	EIF2C2
	chr8	140787472	140799993	SE_02_035300656	SE_02_0353	EIF2C2
	chr8	141115972	141159704	SE_02_035300202	SE_02_0353	DENND3
	chr8	141227391	141246512	SE_02_035300045	SE_02_0353	SLC45A4
	chr8	141264656	141320057	SE_02_035300083	SE_02_0353	LOC731779
	chr8	143564596	143581265	SE_02_035300237	SE_02_0353	C8orf73
	chr8	143731599	143741388	SE_02_035300612	SE_02_0353	LOC100128338
	chr8	143933339	143973501	SE_02_035300021	SE_02_0353	PLEC
	chr9	112166112	112181197	SE_02_035300835	SE_02_0353	SUSD1
	chr9	113562957	113582694	SE_02_035300753	SE_02_0353	RGS3
	chr9	120867884	120878837	SE_02_035300856	SE_02_0353	PHF19
	chr9	121267626	121296149	SE_02_035300223	SE_02_0353	GSN
	chr9	127520233	127577482	SE_02_035300037	SE_02_0353	FAM129B
	chr9	127943872	128012270	SE_02_035300092	SE_02_0353	FAM102A
	chr9	128144911	128151683	SE_02_035300588	SE_02_0353	LCN2
	chr9	128191536	128219010	SE_02_035300761	SE_02_0353	CIZ1
	chr9	129457885	129498093	SE_02_035300166	SE_02_0353	C9orf50
	chr9	129596075	129611304	SE_02_035300391	SE_02_0353	C9orf50
	chr9	133102943	133149071	SE_02_035300068	SE_02_0353	RALGDS
	chr9	134323460	134388030	SE_02_035300042	SE_02_0353	RXRA
	chr9	134403248	134414742	SE_02_035300318	SE_02_0353	RXRA
	chr9	136519607	136545861	SE_02_035300349	SE_02_0353	NOTCH1
	chr9	136766579	136801938	SE_02_035300444	SE_02_0353	TMEM141
	chr9	137292219	137316929	SE_02_035300151	SE_02_0353	NRARP
	chr9	137605679	137615555	SE_02_035300496	SE_02_0353	ARRDC1
	chr9	21542914	21596853	SE_02_035300194	SE_02_0353	LOC554202
	chr9	21677002	21693441	SE_02_035300617	SE_02_0353	MTAP
	chr9	21776129	21804309	SE_02_035300387	SE_02_0353	MTAP
	chr9	33749845	33776152	SE_02_035300569	SE_02_0353	PRSS3
	chr9	35904653	35917114	SE_02_035300536	SE_02_0353	LOC158376
	chr9	38005680	38069207	SE_02_035300193	SE_02_0353	SHB
	chr9	5801379	5859898	SE_02_035300551	SE_02_0353	ERMP1
	chr9	93195788	93245573	SE_02_035300501	SE_02_0353	WNK2
	chr9	94907514	94927001	SE_02_035300404	SE_02_0353	MIR2278
	chrX	123764392	123851493	SE_02_035300306	SE_02_0353	XIAP
	chrX	153969175	153975143	SE_02_035300713	SE_02_0353	TMEM187
	chrX	46315793	46334975	SE_02_035300485	SE_02_0353	ZNF673
	chrX	68826396	68844937	SE_02_035300167	SE_02_0353	EFNB1
